# Supplementary material for: Reduced growth with increased quotas of particulate organic and inorganic carbon in the coccolithophore Emiliania huxleyi under future ocean climate change conditions
Source: Copernicus journal article supplement (doi:10.5194/bg-2020-213), 2020-06-26
Supplement: Supplementary file [file bg-2020-213-AC2-supplement.pdf]

Supplemental Information

**Table S1.** Average surface seawater  $p\text{CO}_2$  level ( $\mu\text{atm}$ ), sea surface temperature ( $^\circ\text{C}$ ), daytime mean irradiance ( $\mu\text{mol photons m}^{-2} \text{s}^{-1}$ ), and nutrient concentration ( $\mu\text{mol L}^{-1}$ ) during 2000 to 2007 in Norwegian coastal waters where the *E. huxleyi* strain used here was isolated from (Larsen et al., 2004; Locarnini et al., 2006; Omar et al., 2010), and in projected levels for 2100 in high-latitude province in North Atlantic Ocean (Future) (Boyd et al., 2015).

|               | $p\text{CO}_2$<br>( $\mu\text{atm}$ ) | Temperature<br>( $^\circ\text{C}$ ) | Daily irradiance<br>( $\mu\text{mol photons m}^{-2} \text{s}^{-1}$ ) | Nitrate<br>( $\mu\text{mol L}^{-1}$ ) | Phosphate<br>( $\mu\text{mol L}^{-1}$ ) |
|---------------|---------------------------------------|-------------------------------------|----------------------------------------------------------------------|---------------------------------------|-----------------------------------------|
| 2000–<br>2007 | 240 – 400                             | 6.0 – 16.0                          | 120 – 350                                                            | 0 – 7.0                               | 0.1 – 0.5                               |
| Future        | 580 – 970                             | 7.9 – 19.0                          | 156 – 455                                                            | 0 – 4.9                               | 0.1 – 0.3                               |

**Table S2.** Comparison of experiment treatments between the studies of Zhang et al. (2019) and this work. Main differences between two studies were marked in bold.

| Driver                                                 | The study of Zhang et al. (2019) |    |                       | The present study |    |                |
|--------------------------------------------------------|----------------------------------|----|-----------------------|-------------------|----|----------------|
| $p\text{CO}_2$ ( $\mu\text{atm}$ )                     | 410, 920                         |    |                       | 370, 960          |    |                |
| Temperature ( $^{\circ}\text{C}$ )                     | 20                               |    |                       | <b>16</b> , 20    |    |                |
| Light ( $\mu\text{mol photons m}^{-2} \text{s}^{-1}$ ) | <b>80, 120, 200, 320, 480</b>    |    |                       | 60, 240           |    |                |
| DIN ( $\mu\text{mol L}^{-1}$ )                         | <b>100</b> , 8                   |    |                       | <b>24</b> , 8     |    |                |
| DIP ( $\mu\text{mol L}^{-1}$ )                         | <b>10</b> , 0.4                  |    |                       | <b>1.5</b> , 0.5  |    |                |
| Experimental setup                                     | HNHP                             | LC | <b>5 light levels</b> | LC                | LT | <b>LL-HNHP</b> |
|                                                        |                                  | HC |                       |                   | HT | <b>HL-HNHP</b> |
|                                                        | LNHP                             | LC |                       |                   |    | <b>HL-LNHP</b> |
|                                                        |                                  | HC |                       | HC                | LT | <b>HL-HNLP</b> |
|                                                        | HNLP                             | LC |                       |                   | HT | <b>HL-LNLP</b> |
|                                                        |                                  | HC |                       |                   |    |                |

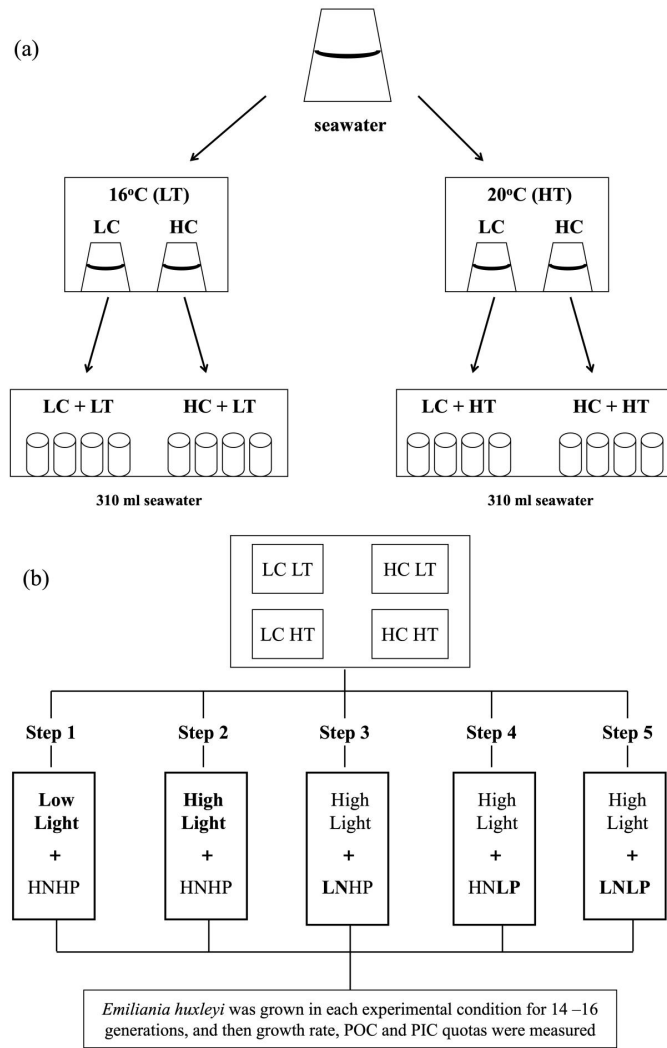

Figure S1

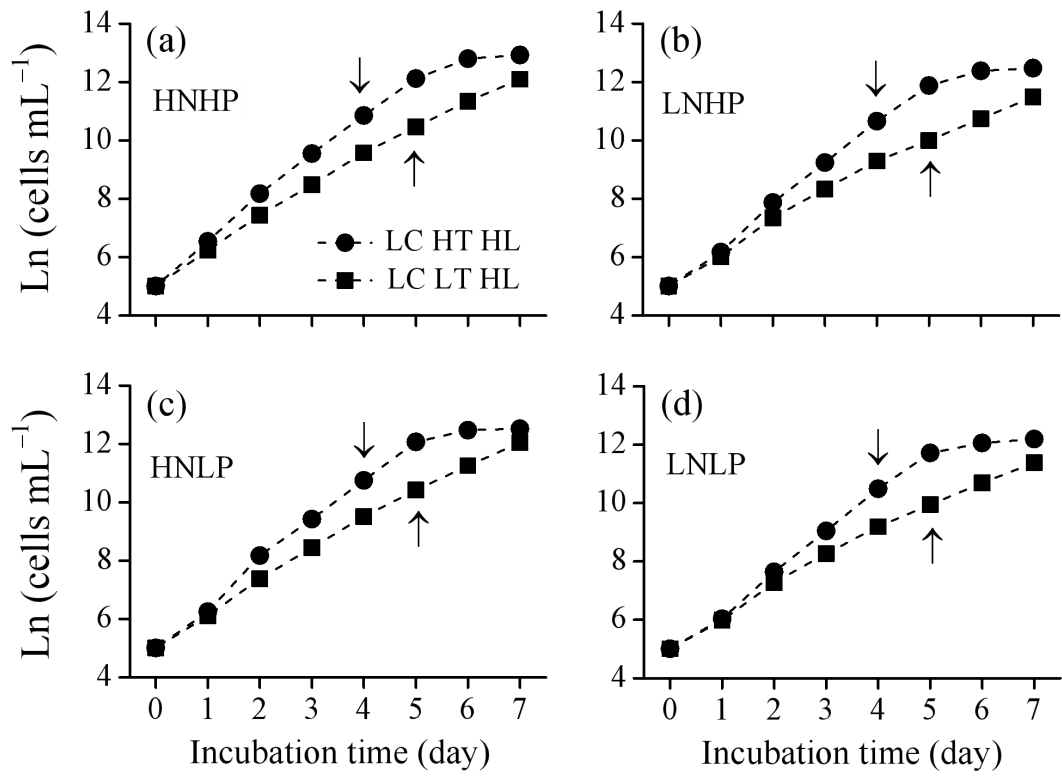

Figure S2

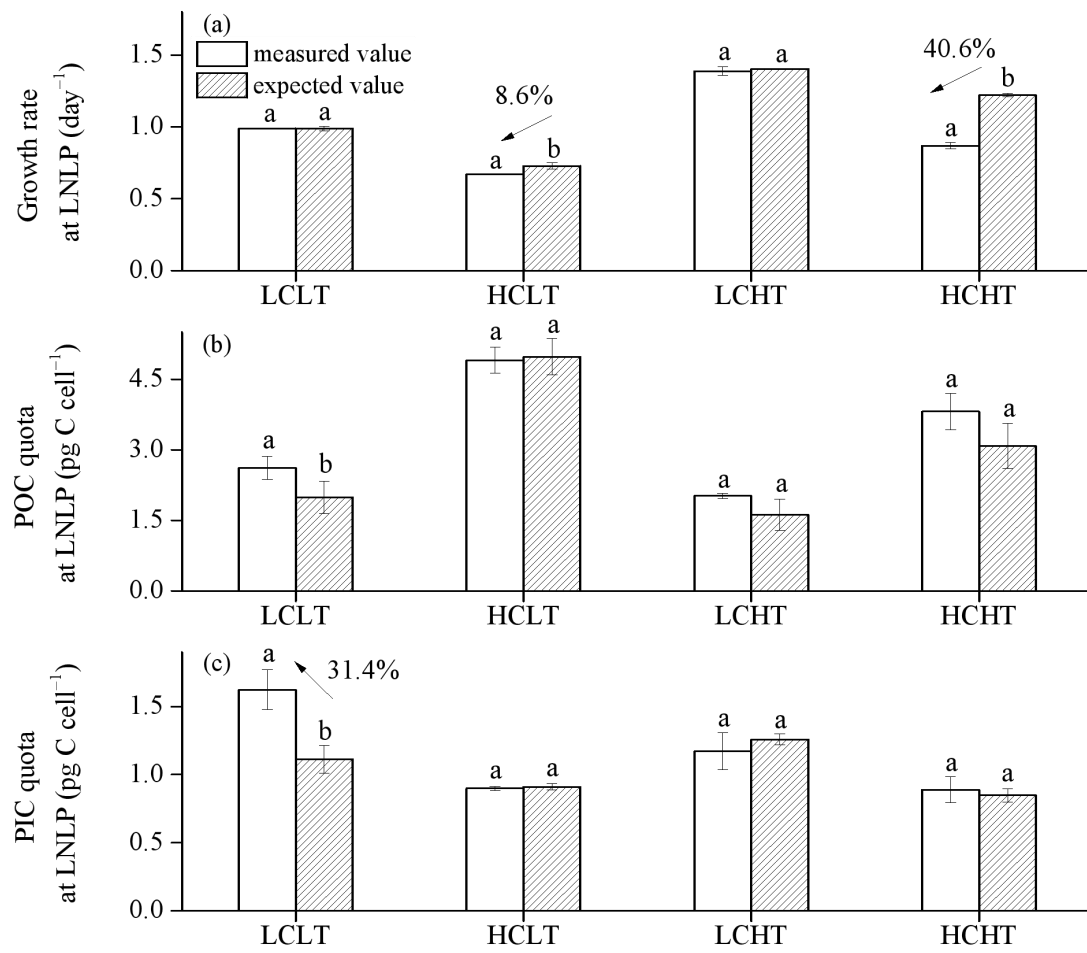

Figure S3

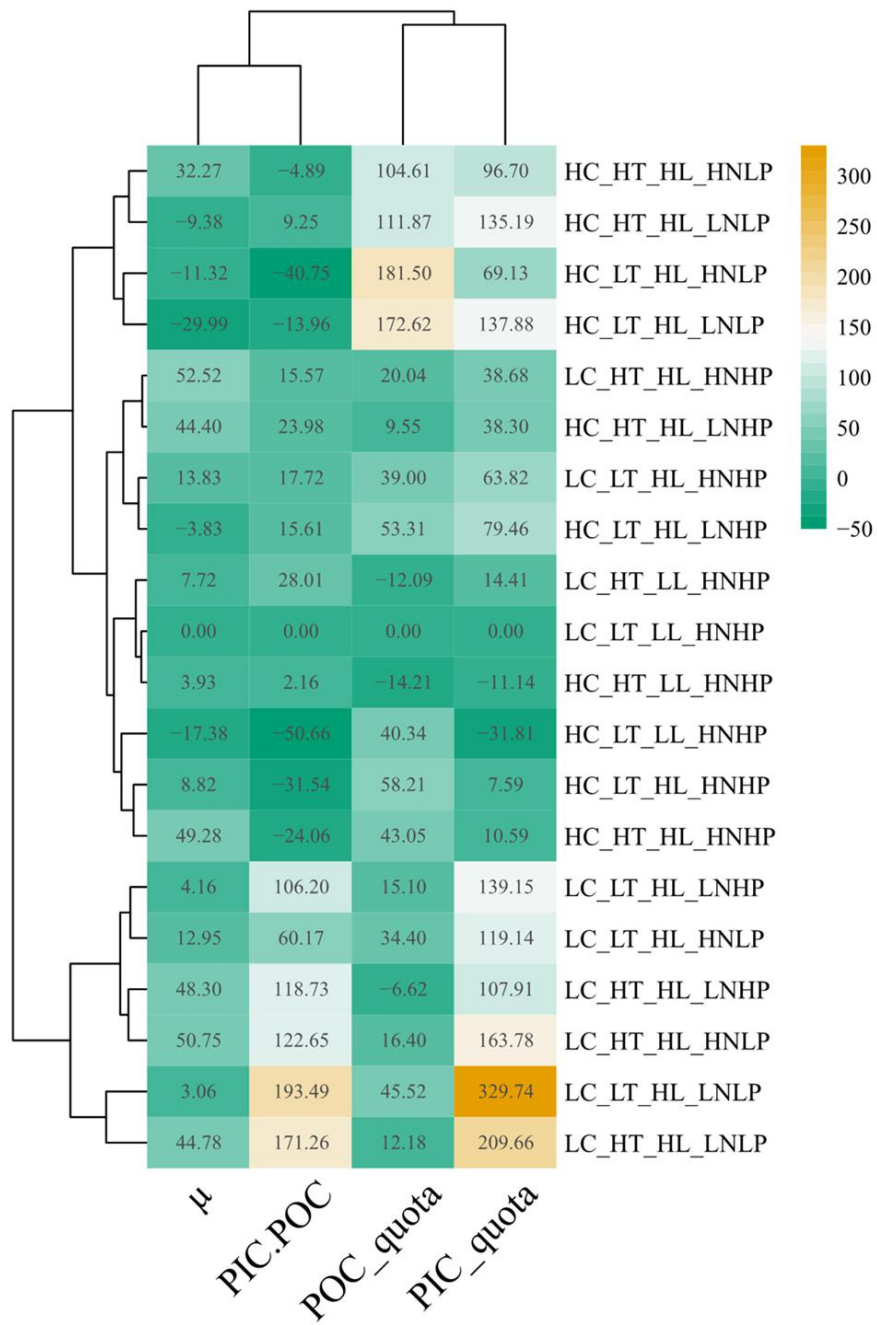

Figure S4

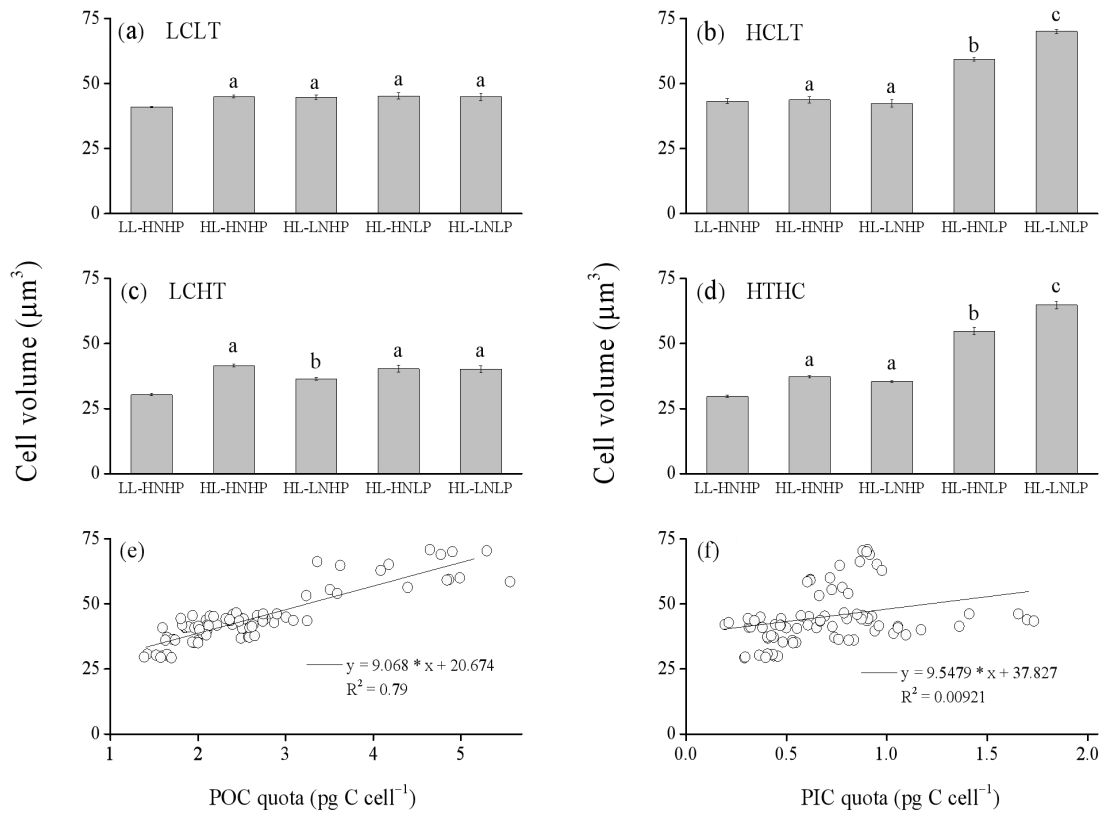

Figure S5

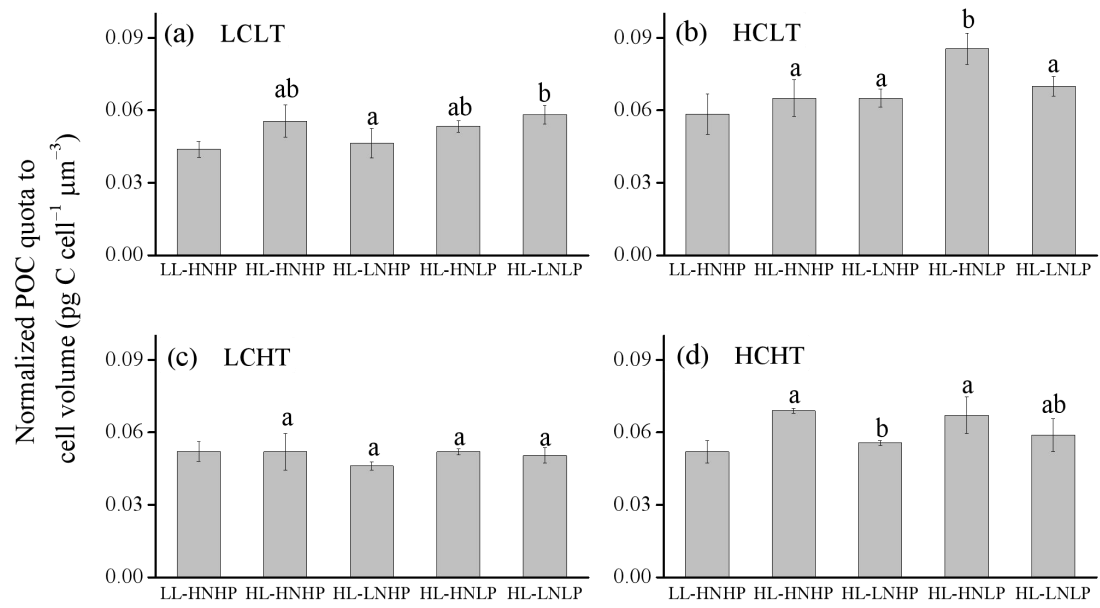

Figure S6



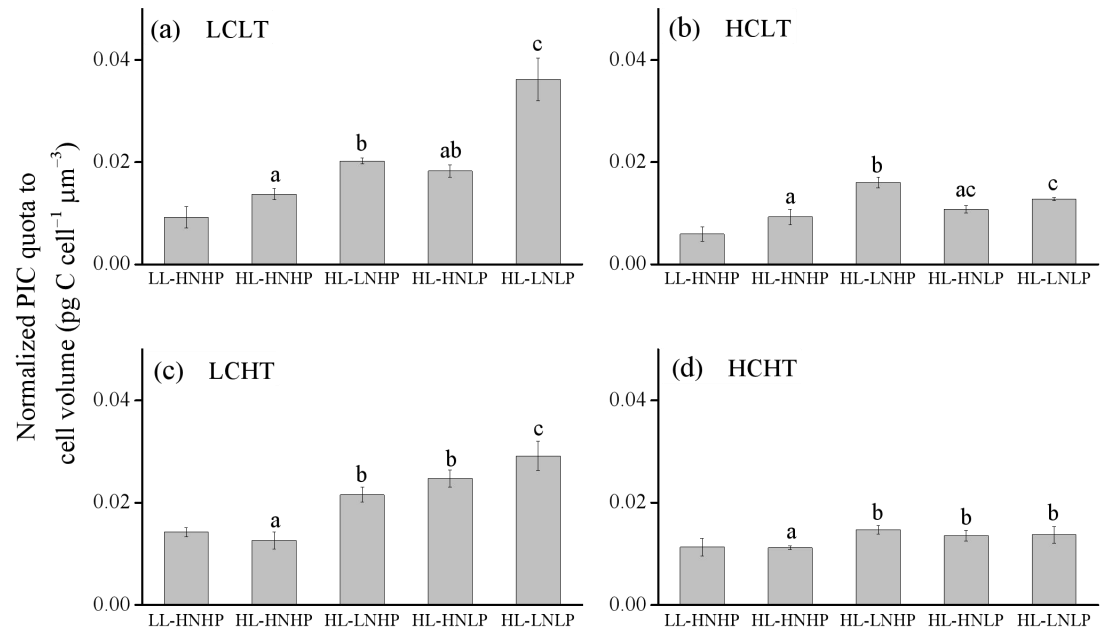

Figure S7

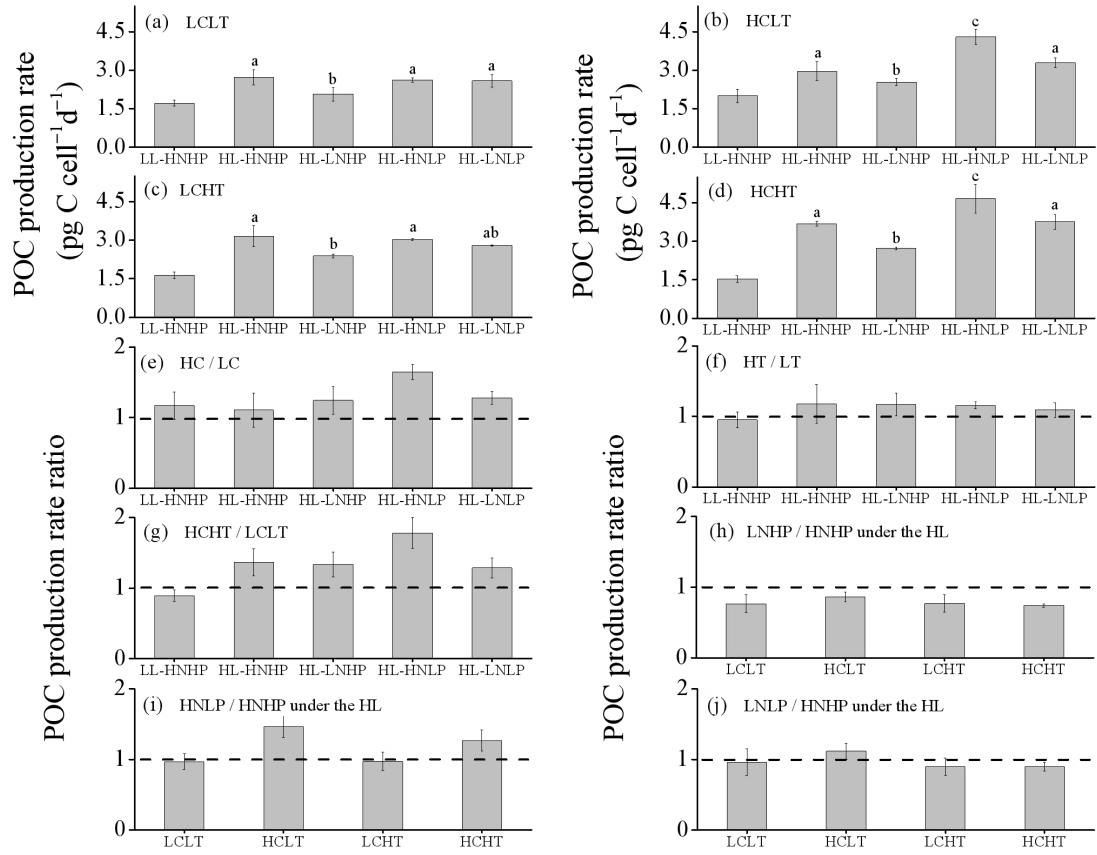

Figure S8

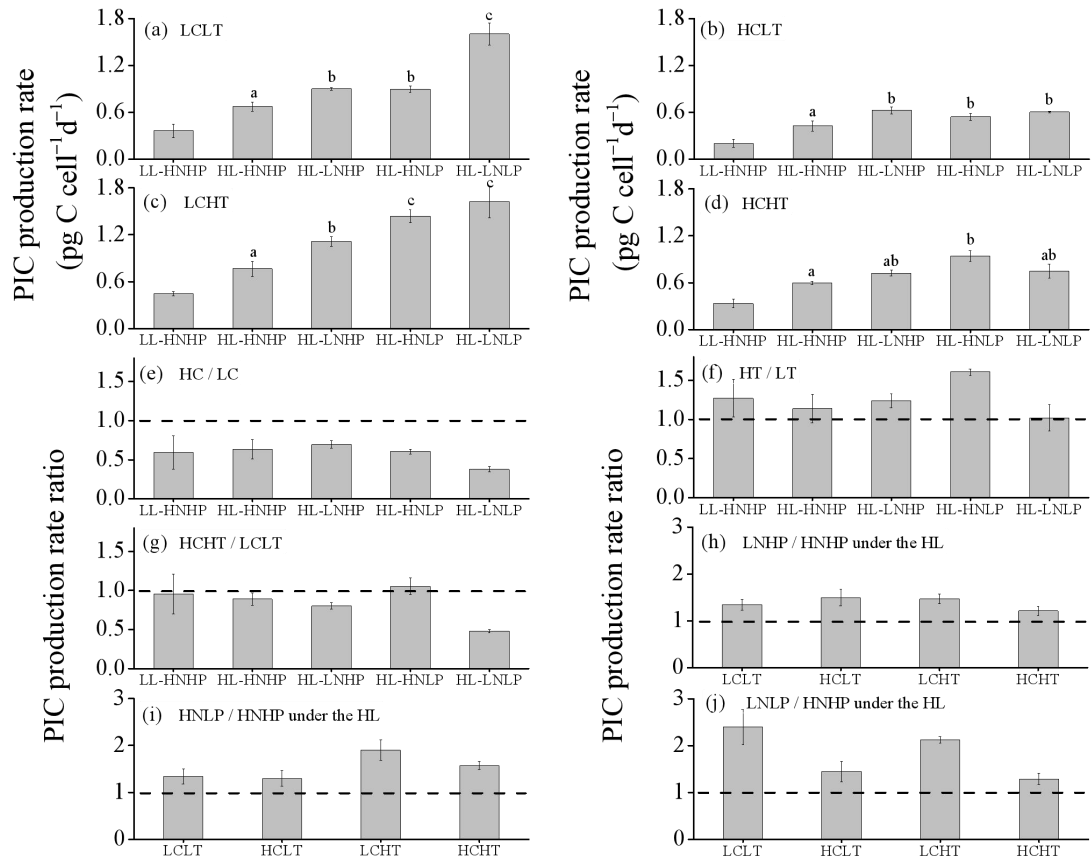

Figure S9

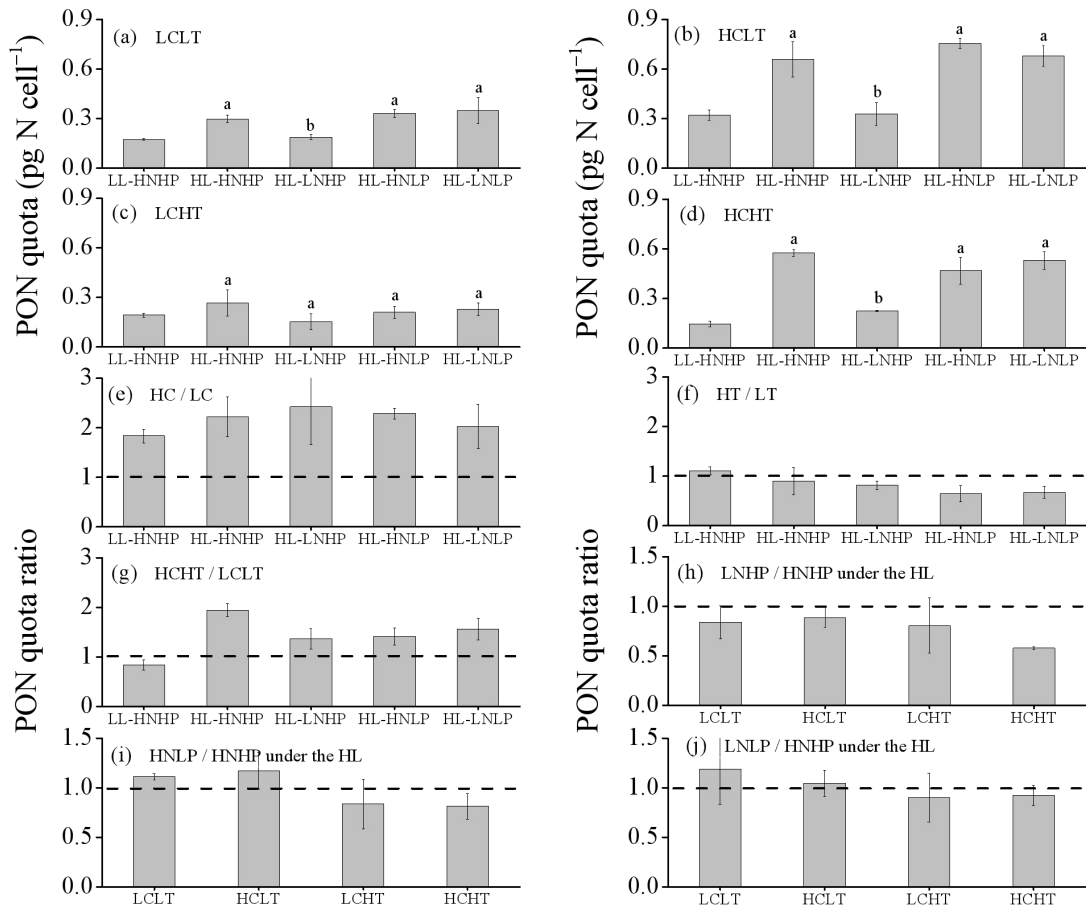

Figure S10

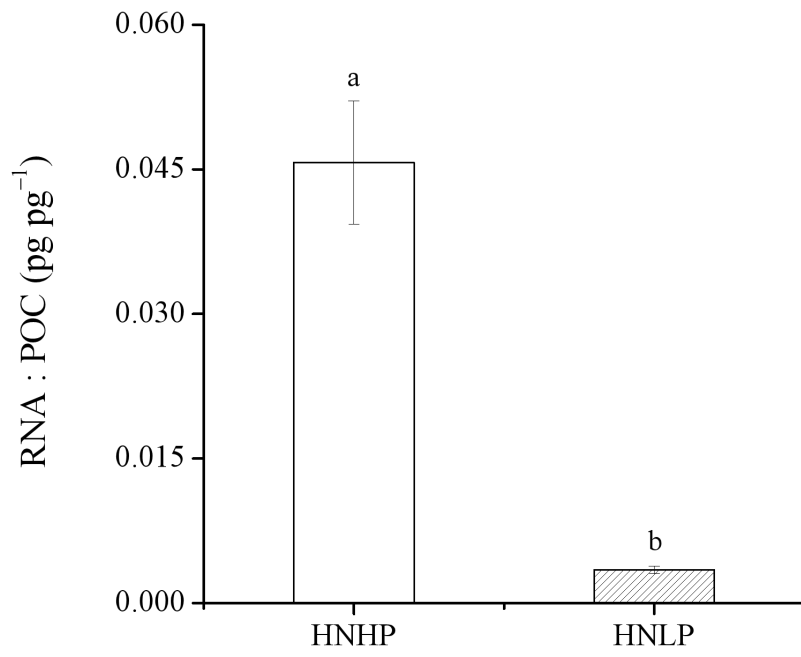

Figure S11

## References

- Boyd, P. W., Lennartz, S. T., Glover, D. M., and Doney, S. C.: Biological ramifications of climate-change-mediated oceanic multi-stressors, *Nat. Clim. Change*, 5, 71–79, doi: 10.1038/nclimate2441, 2015.
- Larsen, A., Flaten, G. A. F., Sandaa, R., Castberg, T., Thyrhaug, R., Erga, S. R., Jacquet, S., and Bratbak, G.: Spring phytoplankton bloom dynamics in Norwegian coastal waters: Microbial community succession and diversity, *Limnol. Oceanogr.*, 49, 180–190, doi: 10.4319/lo.2004.49.1.0180, 2004.
- Locarnini, R. A., Mishonov, A. V., Antonov, J. I., Boyer, T. P., and Garcia, H. E.: World ocean atlas 2005, V. 1: Temperature, edited by: Levitus, S., NOAA Atlas NESDIS 61. U. S. Government Printing Office, 123–134, 2006.
- Omar, A. M., Olsen, A., Johannessen, T., Hoppema, M., Thomas, H., and Borges, A. V.: Spatiotemporal variations of  $f\text{CO}_2$  in the North Sea, *Ocean Sci.*, 6, 77–89, doi: 10.5194/osd-6-1655-2009, 2010.
- Zhang, Y., Fu, F., Hutchins, D. A., and Gao, K.: Combined effects of  $\text{CO}_2$  level, light intensity and nutrient availability on the coccolithophore *Emiliana huxleyi*, *Hydrobiologia*, 842, 127–141, doi: 10.1007/s10750-019-04031-0, 2019.
