# Supplementary material for: Reduced growth with increased quotas of particulate organic and inorganic carbon in the coccolithophore Emiliania huxleyi under future ocean climate change conditions
Source: Copernicus journal article supplement (doi:10.5194/bg-2020-213), 2020-06-26
Supplement: Supplementary file [file bg-2020-213-AC3-supplement.pdf]

1 **Reduced growth with increased quotas of particulate organic and inorganic**  
2 **carbon in the coccolithophore *Emiliana huxleyi* under future ocean climate**  
3 **change conditions**

4

5

6 **Yong Zhang,<sup>1,4</sup> Sinéad Collins,<sup>2</sup> Kunshan Gao<sup>1,3,\*</sup>**

7

8

9 <sup>1</sup>State Key Laboratory of Marine Environmental Science and College of Ocean and  
10 Earth Sciences, Xiamen University, Xiamen, China

11 <sup>2</sup>Institute of Evolutionary Biology, School of Biological Sciences, University of  
12 Edinburgh, Edinburgh EH9 3FL, United Kingdom

13 <sup>3</sup>Co-Innovation Center of Jiangsu Marine Bio-industry Technology, Jiangsu Ocean  
14 University, Lianyungang, China

15 <sup>4</sup>College of Environmental Science and Engineering, and Fujian Key Laboratory of  
16 Pollution Control and Resource Recycling, Fujian Normal University, Fuzhou, China

17

18

19 Running head: Response of *E. huxleyi* to multiple drivers

20

21 \*Correspondence: Kunshan Gao (ksgao@xmu.edu.cn)

22

23 Keywords: CO<sub>2</sub>; coccolithophore; functional trait plasticity; light; multiple drivers;  
24 nutrients; ocean acidification; warming.

25

26 **Abstract**

27 Effects of ocean acidification and warming on marine primary producers can be  
28 modulated by other environmental factors, such as levels of nutrients and light. Here,  
29 we investigated the interactive effects of five oceanic environmental drivers (CO<sub>2</sub>,  
30 temperature, light, dissolved inorganic nitrogen and phosphate) on growth rate,  
31 particulate organic (POC) and inorganic (PIC) carbon quotas of the cosmopolitan  
32 coccolithophore *Emiliana huxleyi*. Population growth rate increased with increasing  
33 temperature (16 to 20 °C) and light intensities (60 to 240 μmol photons m<sup>-2</sup> s<sup>-1</sup>), but  
34 decreased with elevated *p*CO<sub>2</sub> concentrations (370 to 960 μatm) and reduced  
35 availability of nitrate (24.3 to 7.8 μmol L<sup>-1</sup>) and phosphate (1.5 to 0.5 μmol L<sup>-1</sup>). POC  
36 quotas were predominantly enhanced by combined effects of increased *p*CO<sub>2</sub> and  
37 decreased availability of phosphate. PIC quotas increased with decreased availability  
38 of nitrate and phosphate. Our results show that concurrent changes in nutrient  
39 concentrations and *p*CO<sub>2</sub> levels predominantly affected growth, photosynthetic carbon  
40 fixation and calcification of *E. huxleyi*, and imply that plastic responses to progressive  
41 ocean acidification, warming and decreasing availability of nitrate and phosphate  
42 reduce population growth rate while increasing cellular quotas of particulate organic  
43 and inorganic carbon of *E. huxleyi*, ultimately affecting coccolithophore-related  
44 ecological and biogeochemical processes.

45

46

47

48

49

50

## 51 **1 Introduction**

52 Ocean acidification (OA), due to continuous oceanic absorption of anthropogenic CO<sub>2</sub>,  
53 is occurring alongside ocean warming. This in turn, leads to shoaling in the upper  
54 mixed layer (UML) and a consequent reduction in the upward transport of nutrients  
55 into the UML. These ocean changes expose phytoplankton cells within the UML to  
56 multiple simultaneous stressors or drivers, and organismal responses to these drivers  
57 can affect both trophic and biogeochemical roles of phytoplankton (see reviews by  
58 Boyd et al., 2015; Gao et al., 2019 and literatures therein). While most studies on the  
59 effects of ocean global climate changes on marine primary producers have focused on  
60 organismal responses to one, two or three environmental drivers, there is an  
61 increasing awareness of the need to measure the combined effects of multiple drivers  
62 (see reviews by Riebesell and Gattuso, 2015; Boyd et al., 2018; Gao et al., 2019;  
63 Kwiatkowski et al., 2019). For this purpose, several manipulative experimental  
64 approaches have been recommended (Boyd et al., 2018). One approach using many  
65 unique combinations of different numbers of drivers showed that both short and long-  
66 term growth responses were, on average, explained by the dominant single driver in a  
67 multi-driver environment, but this result relies on having many (>5) drivers with  
68 known or measured large-effect single drivers (Brennan and Collins, 2015; Brennan et  
69 al., 2017). For experiments with multiple drivers where interactions are likely to  
70 preclude making predictions from single drivers, where average responses are not the  
71 most informative ones, or where logistics preclude using a very large number of  
72 multi-driver environments, Boyd et al. (2010) suggested an ‘environmental cluster’  
73 method where key drivers (such as temperature, light intensity, nutrient concentration,  
74 CO<sub>2</sub> and Fe) are covaried within experiments, allowing the investigation of  
75 physiological responses of phytoplankton to concurrent changes of the clustered

76 drivers. This approach examines responses to projected overall environmental shifts  
77 rather than pulling apart the biological or statistical interactions between responses to  
78 individual drivers. To our knowledge, studies to date have employed such a driver  
79 clustering approach to investigate responses of diatoms *Fragilariopsis cylindrus*,  
80 *Thalassiosira pseudonana*, *Skeletonema costatum*, and the prymnesiophyte  
81 *Phaeocystis antarctica* to combinations of drivers projected for 2100 (Xu et al., 2014a;  
82 Xu et al., 2014b; Boyd et al., 2016).

83 An environmental cluster approach is especially useful when drivers are known to  
84 interact in terms of the organismal responses they elicit, as is the case for OA, light  
85 levels, and key nutrients acting on population growth rate and carbon fixation (Boyd  
86 et al., 2016). For example, in the cosmopolitan coccolithophore *Emiliana huxleyi*,  
87 interactive effects of OA and light showed that OA increased population growth rate  
88 and photosynthetic carbon fixation under low light, whereas it slightly lowered  
89 population growth rate and photosynthetic carbon fixation under high light  
90 (Zondervan et al., 2002; Kottmeier et al., 2016). In addition, photosynthetic carbon  
91 fixation was further enhanced by longer light exposure at high  $p\text{CO}_2$  levels  
92 (Zondervan et al., 2002). On the other hand, OA can exacerbate the negative impact  
93 of solar UV radiation on photosynthetic carbon fixation and calcification in *E. huxleyi*  
94 under nutrient-replete conditions (Gao et al., 2009), but can increase calcification  
95 (coccolith volume) and particulate organic carbon (POC) quota under phosphate-  
96 limited conditions (Leonardos and Geider, 2005; Müller et al., 2017), demonstrating  
97 that the effects of OA on calcification is likely nutrient-dependent. On the other hand,  
98 ocean warming, which occurs alongside OA, is known to increase coccolith length,  
99 POC, particulate organic nitrogen (PON) and inorganic carbon (PIC) production rates  
100 of several *E. huxleyi* strains (Rosas-Navarro et al., 2016; Feng et al., 2017). Warming

101 has also been shown to increase the optimal  $p\text{CO}_2$  levels for growth, POC and PIC  
102 production rates (Sett et al., 2014). In one case warming was found to compensate for  
103 the negative impact of OA on growth rate under low light intensity (Feng et al., 2008).  
104 Nevertheless, decreased photosynthetic carbon fixation and calcification at reduced  
105 carbonate saturation state (lowered  $\text{Ca}^{2+}$  concentrations) were exacerbated by  
106 warming treatment (Xu et al., 2011). Overall, there is strong evidence that  
107 understanding the plastic responses of this key calcifier to ocean changes requires  
108 investigating responses to the overall expected shift in the environment, in addition to  
109 the detailed studies to date on individual drivers, due to the sheer number of  
110 interactions between individual drivers on traits that affect the trophic and  
111 biogeochemical roles of *E. huxleyi*.

112 Despite known interactions among two- and three-way combinations of OA,  
113 temperature, light, phosphate levels and nitrogen levels, there have been few  
114 empirical studies investigating effects of the larger cluster projected for future surface  
115 ocean changes. The data to date show that interactions among drivers can affect both  
116 the direction and magnitude of trait changes in biogeochemically important taxa. In  
117 addition, based on single or two-driver studies, changes in temperature,  $p\text{CO}_2$ , light,  
118 dissolved inorganic nitrogen (DIN) and phosphate (DIP) in combination are predicted  
119 to affect primary productions (Barton et al., 2016; Monteiro et al., 2016; Boyd et al.,  
120 2018; Gao et al., 2019; Kwiatkowski et al., 2019). Understanding the trait-based  
121 responses of coccolithophores to future ocean changes is important for projections of  
122 changes in the biogeochemical roles of phytoplankton, such as biological carbon  
123 pump efficiency (Rost and Riebesell, 2004).

124 In order to understand the combined effects of  $p\text{CO}_2$ , temperature, light, dissolved  
125 inorganic nitrogen (DIN) and phosphate (DIP) on functional traits, we incubated

126 *Emiliana huxleyi* (Lohmann) under different combinations of environmental  
127 conditions that represented subsets of, and eventually the complete set of  
128 environments for, this environmental driver cluster. We recently examined the  
129 interactive effects of light intensity and CO<sub>2</sub> level on growth rate, POC and PIC  
130 quotas of *E. huxleyi* under nutrients replete, low DIN, or low DIP concentrations  
131 (Zhang et al., 2019). Light, CO<sub>2</sub>, DIN and DIP levels usually change simultaneously  
132 with temperature, and temperature modulated responses of *E. huxleyi* to other  
133 environmental drivers (Gafar and Schulz, 2018; Tong et al., 2019). In addition,  
134 warming or cooling can directly influence the activity of enzymes, thus directly  
135 modulating metabolic rates (Sett et al., 2014). Because of the overwhelming evidence  
136 that temperature can act as a general modulator of organismal responses, we use the  
137 present study to examine how the addition of temperature as a key driver in the  
138 environmental change cluster can modulate the combined effects of CO<sub>2</sub>, light and  
139 nutrients. We found that future ocean scenario treatments with OA, warming,  
140 increased light and reduced availability of nutrients led to lower growth rate and  
141 larger POC and PIC quotas of *E. huxleyi*.

142

## 143 **2 Materials and Methods**

### 144 **2.1 Experimental setup**

145 *Emiliana huxleyi* strain PML B92/11 was originally isolated from coastal waters off  
146 Bergen, Norway, and obtained from the Plymouth algal culture collection, UK. The  
147 average levels of *p*CO<sub>2</sub>, temperature, light, dissolved inorganic nitrate (DIN) and  
148 phosphate (DIP) were set up according to recorded data in Norwegian coastal waters  
149 during 2000 to 2007 and projected for 2100 in high-latitudes (Larsen et al., 2004;  
150 Locarnini et al., 2006; Omar et al., 2010; Boyd et al., 2015) (Table S1). *E. huxleyi* was

151 cultured with a 12 h/12 h light/dark cycle in thermo-controlled incubators in Aquil  
152 medium, which was prepared according to Sunda et al. (2005) with the addition of  
153 2200  $\mu\text{mol L}^{-1}$  bicarbonate to achieve the total alkalinity (TA) of 2200  $\mu\text{mol L}^{-1}$ .  
154 Initial DIN and DIP concentrations were 24  $\mu\text{mol L}^{-1}$  and 1.5  $\mu\text{mol L}^{-1}$ , respectively,  
155 and initial light intensity was 60  $\mu\text{mol photons m}^{-2} \text{s}^{-1}$ . The experiment was conducted  
156 in five steps (Fig. 1). Considering ocean acidification and warming as the key drivers  
157 for ocean climate changes, we first established 4 “baseline” treatments where the  
158  $p\text{CO}_2$  and temperature drivers were combined in a fully factorial way: low  $p\text{CO}_2$  +  
159 low temperature (LCLT), high  $p\text{CO}_2$  + low temperature (HCLT), low  $p\text{CO}_2$  + high  
160 temperature (LCHT), and high  $p\text{CO}_2$  + high temperature (HCHT). Since reduced  
161 availability of nutrients and increased light exposures are triggered by warming-  
162 enhanced stratification, we then added additional single or pairs of drivers to each of  
163 these “baseline” treatments (Fig. S1). In step 1, low light (LL, 60  $\mu\text{mol photons m}^{-2} \text{s}^{-1}$ )  
164 was supplied; in step 2, high light (HL, 240  $\mu\text{mol photons m}^{-2} \text{s}^{-1}$ ) was exposed. HL  
165 was then maintained for the rest of the experiment. In step 3, low nitrogen was  
166 supplied and high phosphate levels were maintained (LNHP). In step 4, low  
167 phosphate was used and high nitrogen levels were restored (HNLP). In step 5, both  
168 nitrogen and phosphate were low (LNLP), respectively (Figs. 1 and S1). In all cases,  
169 the cells were acclimated to each unique stressor cluster for at least 14–16 generations  
170 before physiological and biochemical parameters were measured. Although this  
171 stepwise design introduces a historical effect, physiological traits are generally  
172 reported after 10 to 20 generations acclimation to OA treatment (Perrin et al., 2016;  
173 Tong et al., 2016; Li et al., 2017), so the historical effects here are similar to those that  
174 would be introduced with standard methods in other physiology studies (Tong et al.,  
175 2016; Zhang et al., 2019). Since individually reduced availability of nitrate or

176 phosphate decreased growth, did not change POC quota, and enhanced PIC quota  
177 under optimal light intensity (HL in this study) in the same *E. huxleyi* strain (Zhang et  
178 al., 2019), we hypothesized that combination of DIN and DIP limitation would result  
179 in similar trend under the  $p\text{CO}_2$  and/or temperature combined treatments. Therefore,  
180 we added stepwise nitrate and/or phosphate drivers (Fig. 1). Such stepwise reduction  
181 of nutrients levels would be useful for us to analyze effects of nitrate and phosphate  
182 separately, and be expected to have implications for the cells episodically exposed to  
183 different levels of nutrients in the sea.

184 For step 1,  $\text{NO}_3^-$  and  $\text{PO}_4^{3-}$  were modified to  $24 \mu\text{mol L}^{-1}$  and  $1.5 \mu\text{mol L}^{-1}$ ,  
185 respectively, which is the HNHP treatment in the synthetic seawater (Sunda et al.,  
186 2005) (Fig. S1). The seawater was dispensed into 4 glass bottles, and 2 bottles of  
187 seawater were placed at  $16^\circ\text{C}$  (LT) in an incubator (HP400G-XZ, Ruihua, Wuhan),  
188 and aerated for 24 h with filtered (PVDF  $0.22 \mu\text{m}$  pore size, Haining) air containing  
189  $400 \mu\text{atm}$  (LC) or  $1000 \mu\text{atm}$   $p\text{CO}_2$  (HC). Another 2 bottles of seawater were  
190 maintained at  $20^\circ\text{C}$  (HT) in the other chamber and also aerated with LC or HC air as  
191 described above. The dry air/ $\text{CO}_2$  mixture was humidified with deionized water prior  
192 to the aeration to minimize evaporation. The LCLT, HCLT, LCHT and HCHT  
193 seawaters (Figs. 1a and S1) were then filtered ( $0.22 \mu\text{m}$  pore size, Polycap 75 AS,  
194 Whatman) and carefully pumped into autoclaved 250 mL polycarbonate bottles  
195 (Nalgene, 4 replicate flasks for each of LCLT, HCLT, LCHT and HCHT, a total of 16  
196 flasks at the beginning of the experiment) with no headspace to minimize gas  
197 exchange. The flasks were inoculated at a cell density of about  $150 \text{ cells mL}^{-1}$ . The  
198 volume of the inoculum was calculated (see below) and the same volume of seawater  
199 was taken out from the bottles before inoculation. The samples were initially cultured  
200 at  $60 \mu\text{mol photons m}^{-2} \text{ s}^{-1}$  (LL) of photosynthetically active radiation (PAR)



201 (measured using a PAR Detector, PMA 2132 from Solar Light Company) under  
202 LCLT, HCLT, LCHT and HCHT conditions for 8 generations (6 days) (d), and then  
203 the samples were diluted to their initial concentrations and grown for another 8  
204 generations (6 d) (Fig. 1a). Samples in culture bottles were mixed twice a day at 9:00  
205 a.m. and 5:00 p.m. At the end of the incubation, sub-samples were taken for  
206 measurements of cell concentration, POC and TPC quotas, TA, pH and nutrient  
207 concentrations.

208 In step 2, samples grown under the previous conditions were transferred at the end  
209 of the cultures from 60 (LL) to 240  $\mu\text{mol photons m}^{-2} \text{ s}^{-1}$  (HL) of PAR with initial cell  
210 concentrations of 150 cells  $\text{mL}^{-1}$ , and acclimated to the HL for 8 generations (5 d in  
211 16 °C environment, 4 d in 20 °C environment) (Fig. 1b). The cultures were then  
212 diluted to achieve initial cell concentration and incubated at the HL for another 8  
213 generations (the fifth day in 16 °C environment and the fourth day in 20 °C  
214 environment) before sub-samples were taken for measurements.

215 In step 3, step 4 and step 5,  $\text{NO}_3^-$  and  $\text{PO}_4^{3-}$  concentrations were set to be 8  $\mu\text{mol L}^{-1}$   
216 and 1.5  $\mu\text{mol L}^{-1}$  for the LNHP treatment, and 24  $\mu\text{mol L}^{-1}$  and 0.5  $\mu\text{mol L}^{-1}$  for the  
217 HNLP treatment, and 8  $\mu\text{mol L}^{-1}$  and 0.5  $\mu\text{mol L}^{-1}$  for the LNLP treatment,  
218 respectively (Fig. 1c,d,e). The LCLT, HCLT, LCHT and HCHT were step 1  
219 conditions, now we are into step 3, 4 and 5. Under 240  $\mu\text{mol photons m}^{-2} \text{ s}^{-1}$  (HL) of  
220 PAR, cell samples with an initial concentration of 150 cells  $\text{mL}^{-1}$  were transferred  
221 from HNHP condition (step 2) to LNHP conditions (step 3) and acclimated to LNHP  
222 conditions for 8 generations (5 d in 16 °C environment, 4 d in 20 °C environment)  
223 (Fig. 1c). The cultures were then diluted back to initial cell concentrations and  
224 incubated in the LNHP conditions (step 3) for a further 8 generations. On the last day

225 of the incubation (the fifth day in 16 °C environment and the fourth day in 20 °C  
226 environment), sub-samples were taken for measurements of the parameters.

227 After that, cell samples were transferred stepwise from HNHP conditions (step 2,  
228 Fig. 1b) to HNLP conditions (step 4, Fig. 1d), then from HNLP conditions to LNLP  
229 conditions (step 5, Fig. 1e). Cell samples were acclimated for 8 generations at HNLP  
230 and LNLP conditions, respectively, and followed by another 8 generation incubations  
231 for 4 d at HT and 5 d at LT. On the fourth day (for populations in high temperature  
232 environments) or the fifth day (for populations in low temperature environments),  
233 sub-samples were taken for measurements (Fig. 1d,e). At low nutrient concentrations,  
234 maximal cell concentrations were limited by nutrients (Rouco et al., 2013; Rokitta et  
235 al., 2016). To check whether cells sampled were in exponential growth at each  
236 nutrient level, we examined cell concentrations every day at LCHT, or LCLT and  
237 high light conditions (Fig. S2). We found that cell concentrations were in the  
238 exponential growth phase during the 1<sup>st</sup> and 5<sup>th</sup> days at HT, and during the 1<sup>st</sup> and 7<sup>th</sup>  
239 days at LT. In this study, we took samples in the 4<sup>th</sup> day at HT and in the 5<sup>th</sup> day at LT,  
240 and thus cells sampled were in the exponential growth phase of *E. huxleyi*.

241 In the previous work (Zhang et al., 2019), we transferred *E. huxleyi* cells stepwise  
242 from 80  $\mu\text{mol photons m}^{-2} \text{s}^{-1}$  to 120  $\mu\text{mol photons m}^{-2} \text{s}^{-1}$ , then to 200  $\mu\text{mol photons}$   
243  $\text{m}^{-2} \text{s}^{-1}$ , to 320  $\mu\text{mol photons m}^{-2} \text{s}^{-1}$  and to 480  $\mu\text{mol photons m}^{-2} \text{s}^{-1}$  at both LC and  
244 HC levels under HNHP, LNHP or HNLP conditions, respectively. In this study, we  
245 transferred the same strain from LL to HL under HNHP condition, and then from  
246 HNHP to LNHP or HNLP, and from HNLP to LNLP under HL conditions under 4  
247 “baseline” CO<sub>2</sub> and temperature treatments, in an effort to elucidate interactive and  
248 combined effects of temperature, CO<sub>2</sub>, DIN and DIP (Table S2), in contrast the  
249 previous work carried out under constant temperature (Zhang et al., 2019).

250

## 251 **2.2 Nutrient concentrations and carbonate chemistry measurements**

252 In the first and last days of the incubations, 20 mL samples for determination of  
253 inorganic nitrogen and phosphate concentrations were taken at the same time using a  
254 filtered syringe (0.22  $\mu\text{m}$  pore size, Haining) and measured by using a scanning  
255 spectrophotometer (Du 800, Beckman Coulter) according to Hansen and Koroleff  
256 (1999). The nitrate was reduced to nitrite by zinc cadmium reduction and then total  
257 nitrite concentration was measured. In parallel, 25 mL samples were taken for  
258 determination of total alkalinity (TA) after being filtered (0.22  $\mu\text{m}$  pore size, Syringe  
259 Filter) under moderate pressure using a pump (GM-0.5A, JINTENG) and stored in the  
260 dark at 4 °C for less than 7 d. TA was measured at 20 °C by potentiometric titration  
261 (AS-ALK1+, Apollo SciTech) according to Dickson et al. (2003). Samples for  $\text{pH}_T$   
262 (total scale) determinations were syringe-filtered (0.22  $\mu\text{m}$  pore size), and the bottles  
263 were filled from bottom to top with overflow and closed immediately without  
264 headspace. The  $\text{pH}_T$  was immediately measured at 20 °C by using a pH meter  
265 (Benchtop pH, Orion 8102BN) which was calibrated with buffers (Tris•HCl, Hanna)  
266 at pH 4.01, 7.00 and 10.00. Carbonate chemistry parameters were calculated from TA,  
267  $\text{pH}_T$ , phosphate (at 1.5  $\mu\text{mol L}^{-1}$  or 0.5  $\mu\text{mol L}^{-1}$ ), temperature (at 16 °C or 20 °C), and  
268 salinity using the  $\text{CO}_2$  system calculation in MS Excel software (Pierrot et al., 2006).  
269  $K_1$  and  $K_2$ , the first and second carbonic acid constants, were taken from Roy et al.  
270 (1993).

271

## 272 **2.3 Cell concentration measurements**

273 In the last day of the incubation, ~25 mL samples (8 samples) were taken at the same  
274 time (about 1:00 p.m.). Cell concentration and cell diameter (D) were measured using

275 a Z2 Coulter Particle Count and Size Analyzer (Beckman Coulter). The diameter of  
276 detected particles was set to be 3 to 7  $\mu\text{m}$  in the instrument, which excludes detached  
277 coccoliths (Müller et al., 2012). Cell concentration was also measured by microscopy  
278 (ZEISS), and variation in measured cell concentration between two methods was  $\pm$   
279 7.9% (Zhang et al., 2019). Average growth rate ( $\mu$ ) was calculated for each replicate  
280 according to the equation:  $\mu = (\ln N_1 - \ln N_0) / d$ , where  $N_0$  was 150 cells  $\text{mL}^{-1}$  and  $N_1$   
281 was the cell concentration in the last day of the incubation,  $d$  was the growth period in  
282 days. *E. huxleyi* cells were spherical and its cell volume with coccoliths was  
283 calculated according to the equation:  $V = 3.14 \times (4/3) \times (D/2)^3$ .

284

#### 285 **2.4 Total particulate (TPC) and particulate organic (POC) carbon measurements**

286 100 mL samples for determination of TPC and POC quotas were filtered onto GF/F  
287 filters (pre-combusted at 450 °C for 6 h) at the same time in each treatment. TPC and  
288 POC samples were stored in the dark at  $-20$  °C. For POC measurements, samples  
289 were fumed with HCl for 12 h to remove inorganic carbon, and samples for TPC  
290 measurements were not treated with HCl. All samples were dried at 60 °C for 12 h,  
291 and analyzed using a Thermo Scientific FLASH 2000 CHNS/O elemental analyzer  
292 (Thermo Fisher, Waltham, MA). Particulate inorganic carbon (PIC) quota was  
293 calculated as the difference between TPC quota and POC quota. POC and PIC  
294 production rates were calculated by multiplying cellular contents with  $\mu$  ( $\text{d}^{-1}$ ),  
295 respectively. Variations in measured carbon content between the four replicates were  
296 calculated to be 1–24% in this study.

297

#### 298 **2.5 Data analysis**

299 Firstly, we examined the interactions of temperature,  $p\text{CO}_2$  and light under nutrient-  
300 replete (HNHP) conditions. Here, the effects of temperature,  $p\text{CO}_2$ , light intensity and  
301 their interaction on growth rate, POC and PIC quotas were tested using a three-way  
302 analysis of variance (ANOVA). Secondly, we examined the effects of nutrient  
303 limitation in the different  $p\text{CO}_2$  and temperature environments under the high light  
304 intensity (HL). Here, the effects of temperature,  $p\text{CO}_2$ , dissolved inorganic nitrogen  
305 (DIN), dissolved inorganic phosphate (DIP) and their interaction on growth rate, POC  
306 and PIC quotas were tested using a four-way ANOVA. Finally, a one-way ANOVA  
307 was used to test the differences in growth rate, POC and PIC quotas between present  
308 (defined as low levels of  $p\text{CO}_2$ , temperature and light along with high levels of DIN  
309 and DIP (LC LT LL HN HP)) and future ocean (defined as higher levels of  $p\text{CO}_2$ ,  
310 temperature, and light along with low levels of DIN and DIP (HC HT HL LN LP))  
311 scenarios. A Tukey post hoc test was performed to identify the differences between  
312 two temperatures, two  $p\text{CO}_2$  levels, two DIN or two DIP treatments. Normality of  
313 residuals was conducted with a Shapiro-Wilk's test, and a Levene test was conducted  
314 graphically to test for homogeneity of variances. A generalized least squares (GLS)  
315 model was used to stabilize heterogeneity if variances were non-homogeneous. All  
316 statistical calculations were performed using *R* (R version 3.5.0).

317 In order to quantify the individual effect of nitrate concentration or phosphate  
318 concentration on the physiological and biochemical parameters, we calculated the  
319 change ratio ( $R$ ) of physiological rates according to the equation:  $R = \left| \frac{M_{\text{LNHP or HNLP}}}{M_{\text{HNHP}}} \right|$   
320  $- \frac{M_{\text{HNHP}}}{M_{\text{HNHP}}}$ , where  $M_{\text{LNHP or HNLP or HNHP}}$  represents measured trait values in  
321 LNHP or HNLP or HNHP conditions, and the ' | ' denotes the absolute value  
322 (Schaum et al., 2013). We then calculated the expected growth rate, POC quota and  
323 PIC quota in LNLP conditions based on the measured trait values in HNHP

324 conditions and the change ratios in LNHP and HNLP conditions according to a linear  
325 model:  $E_{LNLP} = (1 - R_{LNHP} - R_{HNLP}) \times M_{HNHP}$  for growth rate and POC quota;  $E_{LNLP} =$   
326  $(1 + R_{LNHP} + R_{HNLP}) \times M_{HNHP}$  for PIC quota (Brennan and Collins, 2015). We tested the  
327 significant differences between the expected trait values ( $E_{LNLP}$ ) and the measured  
328 trait values ( $M_{LNLP}$ ) in LNLP conditions by a one-way ANOVA (Fig. S3). We also  
329 calculated the extent of synergy between LNHP and HNLP on growth rate, POC  
330 quota and PIC quota according to equation:  $S = |E_{LNLP} - M_{HNHP}| / M_{HNHP}$ . Please  
331 see the discussion section for more information.

332

### 333 **3 Results**

#### 334 **3.1 Carbonate chemistry parameters and nutrient concentrations**

335 During the incubations,  $pH_T$  values increased due to organismal activity by, on  
336 average,  $0.03 \pm 0.01$  in LCLT, by  $0.01 \pm 0.01$  in HCLT, by  $0.02 \pm 0.01$  in LCHT and  
337 by  $0.02 \pm 0.01$  in HCHT conditions (Fig. 1f–j; Table 1). Correspondingly, seawater  
338  $pCO_2$  concentrations decreased by  $8.8\% \pm 1.1\%$  in LCLT, by  $6.1\% \pm 4.4\%$  in HCLT,  
339 by  $6.6\% \pm 1.7\%$  in LCHT, and by  $5.4\% \pm 3.6\%$  in HCHT conditions, respectively  
340 (Fig. 1k–o; Table 1).

341 During the incubations, dissolved inorganic nitrogen (DIN) concentrations  
342 decreased by  $28.7\% \pm 6.7\%$  in HNHP and LL (Fig. 1p), by  $26.8\% \pm 5.9\%$  in HNHP  
343 and HL (Fig. 1q), by  $71.1\% \pm 3.3\%$  in LNHP (Fig. 1r), by  $32.9\% \pm 5.6\%$  in HNLP  
344 (Fig. 1s), and by  $69.8\% \pm 3.2\%$  in LNLP conditions (Fig. 1t; Table 2). Dissolved  
345 inorganic phosphate (DIP) concentrations decreased by  $62.2\% \pm 16.5\%$  in HNHP and  
346 LL (Fig. 1u), by  $71.3\% \pm 6.7\%$  in HNHP and HL (Fig. 1v), by  $61.0\% \pm 5.2\%$  in  
347 LNHP (Fig. 1w), by  $83.8\% \pm 5.4\%$  in HNLP (Fig. 1x), and by  $86.3\% \pm 1.4\%$  in LNLP  
348 conditions (Fig. 1y; Table 2).

349 Overall, while organismal activity affected nutrient levels during growth cycles as  
350 expected, the high and low nutrient treatments remained different at all times (Table  
351 2). Organismal activity had minimal effects on carbonate chemistry (see Fig. 1).

352

### 353 **3.2 Population growth rate**

354 Growth rate was significantly lower under the future scenario (HCHT HL LNLP: high  
355 levels of  $p\text{CO}_2$ , temperature and light as well as low levels of nutrients) than under the  
356 present scenario (LCLT LL HNHP: low levels of  $p\text{CO}_2$ , temperature and light  
357 alongside high levels of nutrients) (one-way ANOVA,  $F = 52.6$ ,  $p < 0.01$ ) (Figs. 2a  
358 and 3a,d; Table 2). The effect of increasing  $p\text{CO}_2$  on growth rate is negative at low  
359 light or low nutrients levels, which can be seen by comparing population growth in all  
360 of the HC regimes with their paired LC regimes (Figs. 3a,b,e and S4). The extent of  
361 reduction in population growth rate depends on which other stressors are present.  
362 Compared to present atmospheric  $p\text{CO}_2$  levels (LC, Fig. 3a), growth rates under ocean  
363 acidification (HC, Fig. 3b) decreased by an average of  $17.4\% \pm 1.3\%$  in HNHP and  
364 LL, and by an average of  $4.4\% \pm 1.1\%$  in HNHP and HL conditions (three-way  
365 ANOVA, both  $p < 0.01$ ; Tukey post hoc test, both  $p < 0.01$ ) (Fig. 3e; Tables 2 and 3),  
366 by  $7.6\% \pm 2.6\%$  in LNHP, by  $21.4\% \pm 0.2\%$  in HNLP, and by  $32.1\% \pm 0.5\%$  in  
367 LNLP conditions under the HL, respectively (four-way ANOVA, all  $p < 0.01$ ; Tukey  
368 post hoc test, all  $p < 0.01$ ) (Fig. 3a,b,e; Tables 2 and 4).

369 Across all HT/LT (high/low temperature) regime pairs, population growth rate is  
370 faster in the HT regimes, indicating that increasing temperature from 16 to 20 °C  
371 increases population growth rate in *E. huxleyi* (Figs. 3a,c,f and S4). Compared to the  
372 low temperature (LT, Fig. 3a), growth rates at the high temperature (HT, Fig. 3c)  
373 increased by  $7.7\% \pm 0.7\%$  in HNHP and LL, and by  $34.0\% \pm 0.4\%$  in HNHP and HL

374 conditions (three-way ANOVA, both  $p < 0.01$ ; Tukey post hoc test, both  $p < 0.01$ )  
375 (Fig. 3a,c,f; Tables 2 and 3), by  $42.4\% \pm 0.4\%$  in LNHP, by  $33.5\% \pm 0.5\%$  in HNLP,  
376 and by  $40.4\% \pm 3.1\%$  in LNLP conditions under HL (four-way ANOVA, all  $p < 0.01$ ;  
377 Tukey post hoc test, all  $p < 0.01$ ) (Fig. 3a,c,f; Tables 2 and 4). Compared to low  $p\text{CO}_2$   
378 and low temperature (LCLT, Fig. 3a), growth rates in high  $p\text{CO}_2$  and high  
379 temperature environments (HCHT, Fig. 3d) increased by  $3.9\% \pm 0.9\%$  in HNHP and  
380 LL, and by  $31.1\% \pm 0.1\%$  in HNHP and HL conditions (three-way ANOVA, both  $p <$   
381  $0.01$ ; Tukey post hoc test, both  $p < 0.01$ ) (Fig. 3a,d,g; Tables 2 and 3), by  $38.6\% \pm$   
382  $0.1\%$  in LNHP and by  $17.1\% \pm 1.7\%$  in HNLP, whereas growth rate decreased by  
383  $12.1\% \pm 2.2\%$  in LNLP conditions under HL, respectively (four-way ANOVA, all  $p <$   
384  $0.01$ ; Tukey post hoc test, all  $p < 0.01$ ) (Fig. 3a,d,g; Tables 2 and 4). These results  
385 show that high  $p\text{CO}_2$ , low nitrate and low phosphate concentrations collectively  
386 reduced the population growth rate in *E. huxleyi*, though elevated temperature could  
387 counteract this response.

388 The effects of reduced availability of nutrients on growth are nutrient-specific (Fig.  
389 3). Compared to HNHP and HL, growth rates in LNHP decreased by 3.0–12.1% (all  $p$   
390  $< 0.05$  at LCLT, HCLT, LCHT and HCHT conditions) (Fig. 3h; Tables 2 and 4). In  
391 contrast, HNLP did not significantly affect growth in LC conditions ( $p > 0.1$  in LCLT  
392 and LCHT conditions) (Fig. 3a,c,i), but did lower population growth rate by 11.3–  
393 19.2% in HC conditions (both  $p < 0.01$  at HCLT and HCHT conditions) (Fig. 3b,d,i).  
394 Unsurprisingly, when both nitrate and phosphate levels were reduced, growth rates  
395 always decreased by larger extent compared to environments where they were  
396 reduced individually (Fig. 3h,i,j). Compared to growth rates in HNHP and HL, growth  
397 rates in LNLP were 4.8–10.2% lower in LC environments, and 34.7–40.3% lower in  
398 HC environments (Tukey post hoc test, all  $p < 0.01$  at LCLT, HCLT, LCHT and



399 HCHT conditions) (Fig. 3a–d,j; Tables 2 and 4). In summary, nitrate and phosphate  
400 limitation exacerbated the impacts of OA and warming on population growth rate.

401

### 402 **3.3 POC quota**

403 Cellular POC quotas were two-fold larger under the future scenario (HCHT HL LNLP)  
404 than under the current scenario (LCLT LL HNHP) (one-way ANOVA,  $F = 96.1$ ,  $p <$   
405  $0.01$ , Figs. 2b and 4a,d). The effect of increasing  $p\text{CO}_2$  on POC quota is positive,  
406 regardless of other drivers present, which can be seen by comparing POC quotas in all  
407 of the HC regimes with their paired LC regimes (Figs. 4a,b,e and S4), though the  
408 extent of increase in POC quota depends on which other stressors are present.  
409 Compared to current atmospheric  $p\text{CO}_2$  level (LC, Fig. 4a), POC quotas under ocean  
410 acidification (Fig. 4b) increased by  $40.3\% \pm 10.1\%$  in HNHP and LL (Tukey post hoc  
411 test,  $p < 0.01$ ), by  $13.8\% \pm 10.1\%$  in HNHP and HL ( $p = 0.47$ ), by  $33.2\% \pm 11.1\%$  at  
412 LNHP, by  $109.4\% \pm 14.0\%$  in HNLP and by  $87.3\% \pm 10.8\%$  in LNLP conditions  
413 under HL, respectively (four-way ANOVA, all  $p < 0.01$ ; Tukey post hoc test, all  $p <$   
414  $0.01$ ) (Fig. 4a,b,e; Tables 2 and 4).

415 The effect of elevated temperature on POC quota can be seen by comparing POC  
416 quota in all of the HT regimes with their paired LT regimes (Figs. 4a,c,f and S4).  
417 Across all HT/LT regime pairs, POC quotas did not show significant differences  
418 between the HT and LT regimes under HNHP and LL, HNHP and HL, LNHP, HNLP  
419 and LNLP conditions under HL, respectively (Tukey post hoc test, all  $p > 0.1$ ) (Fig.  
420 4a,c,f). This demonstrated that increasing temperature within the test range had no  
421 significant effect on POC quota. The combined effects of increasing  $p\text{CO}_2$  and  
422 temperature on POC quotas were nutrient dependent. Compared to low  $p\text{CO}_2$  and low  
423 temperature (LCLT, Fig. 4a), POC quotas at high  $p\text{CO}_2$  and high temperature (HCHT,

424 Fig. 4d) did not show significant differences in HNHP and LL ( $p = 0.79$ ), in HNHP  
425 and HL ( $p = 0.99$ ), and in LNHP and HL ( $p = 0.99$ ), but increased by  $52.2\% \pm 20.6\%$   
426 in HNLP and by  $45.6\% \pm 14.8\%$  in LNLP conditions under HL (Tukey post hoc test,  
427 both  $p < 0.01$ ) (Fig. 4a,d,g; Tables 2 and 4). These data showed that high  $p\text{CO}_2$  and  
428 low phosphate concentrations enhanced POC quotas of *E. huxleyi*, and that their  
429 combined effects were partly reduced by rising temperature.

430 The effects of nutrient reduction on POC quota are nutrient specific (Fig. 4).  
431 Compared to HNHP and HL, POC quotas in LNHP did not show a significant  
432 difference (all  $p > 0.1$  at LCLT, HCLT, LCHT and HCHT) (Fig. 4a–d,h; Tables 2 and  
433 4). At LC, POC quotas did not significantly differ between HNHP, HNLP and LNLP  
434 conditions (Tukey post hoc test, all  $p > 0.1$ ) (Fig. 4a,c,i,j). In contrast, in HC, they  
435 were 43.3–78.2% larger in HNLP or LNLP than in HNHP (all  $p < 0.01$ ) (Fig. 4b,d,i,j;  
436 Table 2).

437

### 438 **3.4 PIC quota**

439 Cellular PIC quotas were significantly larger in the future scenario with high levels of  
440  $p\text{CO}_2$ , temperature and light along with low nutrients concentrations, than PIC quotas  
441 in the present scenario with low levels of  $p\text{CO}_2$ , temperature and light along with  
442 relatively high nutrients concentrations (one-way ANOVA,  $F = 63.6$ ,  $p < 0.01$ ) (Figs.  
443 2c and 5a,d). However, the opposite results were found under the elevated  $\text{CO}_2$   
444 treatment alone. The effect of increasing  $p\text{CO}_2$  on PIC quota is negative, regardless of  
445 presence of other drivers. By comparing PIC quota in all of the HC regimes with their  
446 paired LC regimes (Figs. 5a,b,e and S4), the effects of elevated  $p\text{CO}_2$  level are clear,  
447 though the extent of reduction in PIC quota depends on which other stressors are  
448 present. Compared to present atmospheric  $p\text{CO}_2$  levels (LC, Fig. 5a), PIC quotas

449 under ocean acidification (Fig. 5b) are reduced by  $31.8\% \pm 17.1\%$  in HNHP and LL,  
450 by  $34.3\% \pm 10.0\%$  in HNHP and HL, by  $25.0\% \pm 3.8\%$  in LNHP, by  $22.8\% \pm 6.3\%$  in  
451 HNLP and by  $44.6\% \pm 0.9\%$  in LNLP conditions under HL, respectively (Tukey post  
452 hoc test, all  $p < 0.05$ ) (Fig. 5a,b,e; Tables 2–4). The extent of reduction in PIC quota  
453 is larger under LNLP conditions.

454 The effects of rising temperature on PIC quota were nutrient dependent, and can be  
455 seen by comparing PIC quotas in the HT regimes with those in their paired LT  
456 regimes (Figs. 5a,c,f and S4). Compared to low temperature (LT, Fig. 5a), PIC quotas  
457 at high temperature (HT, Fig. 5c) did not show significant differences in HNHP and  
458 LL, in HNHP and HL, in LNHP, and in HNLP conditions (Tukey post hoc test, all  $p >$   
459  $0.05$ ), whereas they decreased by  $27.9\% \pm 8.4\%$  in LNLP conditions under HL  
460 (Tukey post hoc test,  $p < 0.01$ ) (Fig. 5a,c,f; Tables 2–4). The combined effects of  
461 rising  $p\text{CO}_2$  and temperature on PIC quota are negative, regardless of which other  
462 drivers are present (Fig. 5a,d,g). Compared to low  $p\text{CO}_2$  and low temperature (LCLT,  
463 Fig. 5a), PIC quotas in high  $p\text{CO}_2$  and high temperature (HCHT, Fig. 5d) declined by  
464  $11.1\% \pm 10.9\%$  in HNHP and LL ( $p = 0.96$ ), by  $32.5\% \pm 2.4\%$  in HNHP and HL ( $p <$   
465  $0.01$ ), by  $42.2\% \pm 3.2\%$  in LNHP ( $p < 0.01$ ), by  $10.2\% \pm 7.7\%$  in HNLP ( $p = 0.92$ ),  
466 and by  $45.3\% \pm 5.9\%$  in LNLP conditions under HL, respectively ( $p < 0.01$ ) (Fig.  
467 5a,d,g; Table 2).

468 Effects of both nitrate and phosphate reduction on PIC quota are positive,  
469 regardless of levels of  $p\text{CO}_2$  and temperature for the range used here (Fig. 5h,i,j).  
470 Compared to HNHP and HL, PIC quotas were larger in LNHP (Tukey post hoc test,  $p$   
471  $< 0.01$  in LCLT, HCLT and LCHT conditions;  $p = 0.73$  at HCHT condition) (Fig. 5h),  
472 in HNLP, and in LNLP conditions, respectively (all  $p < 0.01$  at LCLT, HCLT, LCHT  
473 and HCHT conditions) (Fig. 5a–d,i,j; Table 2). In addition, PIC quotas were larger in

474 LNLP than in HNLP conditions (Tukey post hoc test,  $p < 0.01$  in LCLT and HCLT  
475 conditions;  $p = 0.06$  in LCHT;  $p = 0.21$  in HCHT conditions) (Fig. 5a–d,i,j). These  
476 data showed that low nitrate and phosphate concentrations act synergistically to  
477 increase PIC quotas, which was moderated under the high  $p\text{CO}_2$ .

478

### 479 **3.5 PIC / POC value**

480 The ratio of PIC to POC (PIC / POC value) was not significantly different between  
481 the future scenario (HCHT HL LNLP) and the current scenario (LCLT LL HNHP)  
482 (one-way ANOVA,  $F = 0.3$ ,  $p = 0.60$ ) (Figs. 2d and 6a,d). The PIC / POC value  
483 followed the same trend as for PIC quotas described above. The effect of increasing  
484  $p\text{CO}_2$  on PIC / POC value was negative, regardless of which other drivers were  
485 present (Figs. 6a,b,e and S4), but the extent of reduction in PIC / POC value depended  
486 on presence of other drivers. Compared to current atmospheric  $p\text{CO}_2$  levels (LC, Fig.  
487 6a), PIC / POC values under ocean acidification (HC, Fig. 6b) decreased by  $50.7\% \pm$   
488  $18.2\%$  in HNHP and LL, by  $41.8\% \pm 15.4\%$  in HNHP and HL, by  $43.9\% \pm 5.8\%$  in  
489 LNHP, by  $63.0\% \pm 4.2\%$  in HNLP, and by  $70.7\% \pm 2.0\%$  in LNLP conditions under  
490 HL, respectively (Tukey post hoc test, all  $p < 0.05$ ) (Fig. 6a,b,e; Table 2).

491 The effect of rising temperature on PIC / POC value was nutrient dependant (Figs.  
492 6a,c,f and S4). Compared to low temperature (LT, Fig. 6a), PIC / POC values at high  
493 temperature (HT, Fig. 6c) did not show significant differences in HNHP and LL, in  
494 HNHP and HL, in LNHP, and in LNLP conditions (Tukey post hoc test, all  $p > 0.1$ ),  
495 whereas they increased by  $39.0\% \pm 8.9\%$  in HNLP conditions (Tukey post hoc test,  $p$   
496  $= 0.006$ ) (Fig. 6a,c,f; Table 2). The combined effects of elevated  $p\text{CO}_2$  and  
497 temperature on PIC / POC values were negative (Fig. 6a,d,g). Relative to low  $p\text{CO}_2$   
498 and low temperature (LCLT, Fig. 6a), PIC / POC values at high  $p\text{CO}_2$  and high

499 temperature (HCHT, Fig. 6d) did not show significant differences in HNHP and LL,  
500 and in HNHP and HL conditions (Tukey post hoc test, both  $p > 0.1$ ), but they  
501 decreased by  $39.9\% \pm 3.0\%$  in LNHP, by  $40.6\% \pm 5.8\%$  in HNLP, and by  $67.8\% \pm$   
502  $3.1\%$  in LNLP conditions under HL, respectively (Tukey post hoc test, all  $p < 0.01$ )  
503 (Fig. 6a,d,g; Table 2).

504 Across all LNHP/HNHP (low/high nitrate) regime pairs, PIC / POC values were  
505 higher in the LNHP regime (Fig. 6h), though the extent of increase in PIC / POC  
506 values depended on  $p\text{CO}_2$  or temperature levels. Compared to HNHP and HL, PIC /  
507 POC values in LNHP were about  $106.0\% \pm 13.0\%$  larger (Tukey post hoc test,  $p <$   
508  $0.05$  in LCLT and LCHT conditions;  $p > 0.05$  in HCLT and HCHT conditions) (Fig.  
509 6a–d, h; Table 2). The effect of phosphate on PIC / POC value also depended on  
510  $p\text{CO}_2$  levels (Fig. 6i). In LC, PIC / POC values were larger in HNLP than in HNHP ( $p$   
511  $= 0.22$  at LCLT;  $p < 0.05$  at LCHT conditions), and in LNLP than in LP ( $p < 0.01$  at  
512 LCLT;  $p = 0.09$  in LCHT conditions) (Fig. 6a,c). In HC conditions, PIC / POC values  
513 did not show significant differences among HNHP, HNLP and LNLP conditions  
514 (Tukey post hoc test, all  $p > 0.05$  in HCLT and HCHT conditions) (Fig. 6b,d; Table 2).

515

#### 516 **4 Discussion**

517 Understanding effects of multiple drivers is helpful for improving how  
518 coccolithophores are represented in models (Krumhardt et al., 2017). Responses of  
519 growth, POC and PIC quotas to ocean acidification have been shown to be modulated  
520 by temperature (Gafar and Schulz, 2018; Tong et al., 2019), light intensity or light  
521 period (light : dark cycle) (Jin et al., 2017; Bretherton et al., 2019), DIN or DIP  
522 concentrations (Müller et al., 2017), combinations of light intensity and nutrients  
523 availability (Zhang et al., 2019) (Table 5). Following up our previous study (Zhang et

524 al., 2019), we added temperature as a key driver of 5 drivers (Table S2), and explored  
525 how temperature changes would modulate the combined effects of CO<sub>2</sub>, light, DIN  
526 and DIP that we previously reported. Our data showed that a future ocean climate  
527 change cluster (increasing CO<sub>2</sub>, temperature, and light levels along with decreasing  
528 DIN and DIP levels) can lower growth rate with increased POC and PIC quota per  
529 cell (Fig. 2) as a result of plastic responses to the drivers. In contrast, observations of  
530 coccolithophore Chl *a* increased from 1990 to 2014 in the North Atlantic, and rising  
531 CO<sub>2</sub> and temperature has been associated with accelerated growth of  
532 coccolithophores since 1965 in the North Atlantic (Rivero-Calle et al., 2015;  
533 Krumhardt et al., 2016). Our results from laboratory experiments with multiple  
534 drivers experiment instead predicted a different trend with progressive ocean climate  
535 changes. We have to admit that results from laboratory experiments can hardly  
536 extrapolate to natural conditions. Nevertheless, our data provide mechanistic  
537 understanding of the combined effects of ocean climate change drivers, which can be  
538 useful in analyzing field observations.

539 It should also be noted that regional responses to ocean global changes could differ  
540 due to chemical and physical environmental differences and species and strain  
541 variability among different oceans or regions (Blanco-Ameijeiras et al., 2016; Gao et  
542 al., 2019), and that this could also explain discrepancies between experiments and  
543 observations. Different *E. huxleyi* strains displayed optimal responses to a broad range  
544 of temperature or CO<sub>2</sub> level, and *E. huxleyi* strains isolated from different regions  
545 showed local adaptation to temperature or CO<sub>2</sub> level (Zhang et al., 2014; 2018).  
546 Strain-specific responses of growth, POC and PIC production rates in *E. huxleyi*  
547 isolated from different regions to changing seawater carbonate chemistry have also  
548 been documented (Langer et al., 2009). It has been suggested that inter-strain genetic

549 variability has greater potential to induce larger phenotypic differences than the  
550 phenotypic plasticity of a single strain cultured under a broad range of variable  
551 environmental conditions (Blanco-Ameijeiras et al., 2016). On the other hand, the  
552 genetic adaptation to culture experimental conditions over time may no longer  
553 accurately represent the cells in the sea, as reflected in a diatom (Guan and Gao, 2008).  
554 Phytoplankton species that had been maintained under laboratory conditions might  
555 have lost original traits and display different responses to environmental changes  
556 (Lakeman et al., 2009). The strain used in this study has been kept in the laboratory  
557 for about 30 years, and the data obtained in this work can hardly reflect relation to its  
558 biogeographic origin.

559 The decreased availability of nitrate or phosphate individually reduced growth rate  
560 and increased PIC quota, respectively, in this experiment. Furthermore, under LNLP  
561 and high  $p\text{CO}_2$  levels, measured growth rates were significantly lower than the  
562 expected values estimated on the basis of the values in LNHP and HNLP conditions  
563 (Fig. S3a). This indicates synergistic negative effects of LN and LP on growth rate, an  
564 evidence that colimitation of N and P is more severe than that by N or P alone. Here,  
565 the extent of synergy between LN and LP on growth rate was calculated to be  
566  $8.6\% \pm 2.8\%$  at low temperature and to be  $40.6\% \pm 3.8\%$  at high temperature (Fig. S3a),  
567 suggesting modulating effect of temperature on response of growth rate to nutrient  
568 limitations (Thomas et al., 2017). Similarly, at LNLP and low  $p\text{CO}_2$  level, the  
569 measured PIC quota was significantly larger than the expected value (Fig. S3c),  
570 indicating synergistic positive effects of LN and LP on PIC quota, with the extent of  
571 synergy being  $31.4\% \pm 3.9\%$  at low temperature. LN and LP did not synergistically act  
572 to reduce POC quota.

573 While there were always interactions among stressors, increased temperature itself  
574 sped up population growth to a relatively consistent value at high light, regardless of  
575 nutrient limitation, with statistically significant but small differences over the different  
576 nutrient regimes (Fig. 3f). Rising  $p\text{CO}_2$  level not only decreased the absolute values of  
577 growth rate, but also reduced the positive effect of high temperature on growth. In  
578 addition, elevated  $p\text{CO}_2$  also altered patterns of growth responses to changes in light  
579 and nutrient levels (Fig. 3e–g). In ocean acidification condition, the negative effect of  
580 low pH on growth rate of the same *E. huxleyi* strain PML B92/11 was larger than the  
581 positive effect of high  $\text{CO}_2$  concentration (Bach et al., 2011). Our data further showed  
582 that low-pH inhibited growth to lesser extent under the high light than under low light  
583 (Fig. 3e; Table 2). One possible explanation for this could be that photosynthesis  
584 under the high light regime could generate more energy-conserving compounds  
585 (Fernández et al., 1996). This results in faster  $p\text{CO}_2$  removal and counteracts the  
586 negative effects of low pH. This interaction between low pH and high light was also  
587 observed when *E. huxleyi* strains PML B92/11 and CCMP 2090 were grown under  
588 incident sunlight (Jin et al., 2017).

589 Increases in temperature reduced PIC quotas under some conditions (high light  
590 (HL), HL-LNHP and HL-LNLP) (Fig. 5f), suggesting that the ratio of N:P is  
591 important in modulating calcification under warming. One striking result is the  
592 consistent negative effect of high  $p\text{CO}_2$  on growth and PIC quota, regardless of other  
593 stressors. While  $p\text{CO}_2$  levels affected the absolute PIC values, the combination of  
594 high  $p\text{CO}_2$  and warming did not affect the responses to light and nutrients once the  
595 direct reduction in PIC quota due to increased  $p\text{CO}_2$  was taken into account (Fig. 5g).  
596 It has been documented that PIC quotas of *E. huxleyi* strain PML B92/11 reduced at  
597 high  $p\text{CO}_2$  due to suppressed calcification (Riebesell and Tortell, 2011). This



598 knowledge has been based on experiments under nutrient-replete or constant  
599 conditions without consideration of multiple drivers. In this work, PIC quota of *E.*  
600 *huxleyi* under OA were raised with increased light intensity and decreased availability  
601 of nutrients (Figs. 2 and 5). These results are consistent with other studies (Perrin et  
602 al., 2016; Jin et al., 2017), which reported that nutrient limitations enhanced  
603 calcification, and high light intensity could make cells to remove H<sup>+</sup> faster and then  
604 reduce the negative effect of low pH on calcification of *E. huxleyi* (Jin et al., 2017).  
605 Our data also indicate that effects of ocean climate change on calcification of *E.*  
606 *huxleyi* are more complex than previously thought (Meyer and Riebesell, 2015). It is  
607 worth noting that the observed higher POC and PIC quotas under future ocean climate  
608 change scenario could be attributed to cell cycle arrest of a portion of the community  
609 (Vaulot et al., 1987). Decreased availabilities of nitrate and phosphate can extend the  
610 G1 phase where photosynthetic carbon fixation and calcification occurred, and lead to  
611 lower dark respiration which reduces carbon consumption (Vaulot et al., 1987; Müller  
612 et al., 2008; Gao et al., 2018).

613       Synthesis of RNA is a large biochemical sink for phosphate in *E. huxleyi* and other  
614 primary producers (Dyhrman, 2016). In this study, RNA content per cell was verified  
615 by a SYBR Green method (Berdalet et al., 2005). Compared to HNHP conditions,  
616 HNLP-grown cells had only 7.8% of total RNA (Fig. S11). This indicates that  
617 decreased availability of phosphate strongly decreased RNA synthesis, which would  
618 consequently extend the interphase of the cell cycle where calcification occurs  
619 (Müller et al., 2008). This could explain why PIC quotas were enhanced by decreased  
620 phosphate availability (Fig. 5). Similarly, decreased availability of nitrate decreased  
621 protein (or PON) synthesis (Fig. S10), which can also block cells in the interphase of  
622 the cell cycle, and increase the time available for calcification in *E. huxleyi* (Vaulot et

623 al., 1987). Consistently with this, lower rates of assimilation or organic matter  
624 production in *E. huxleyi* in LNHP than in HNHP treatments are consistent with more  
625 energy being reallocated to use for calcification (Nimer and Merrett, 1993; Xu and  
626 Gao, 2012).

627 Low phosphate concentrations can induce high affinity phosphate uptake in *E.*  
628 *huxleyi* (Riegman et al., 2000; Dyhrman and Palenik, 2003; McKew et al., 2015). This  
629 mechanism enables *E. huxleyi* to take up phosphate efficiently at low  $p\text{CO}_2$   
630 concentrations, so that no significant difference in growth rate was observed between  
631 HNLP and HNHP treatments (Fig. 3a,c). However, at high  $p\text{CO}_2$ , low phosphate  
632 concentration (HNLP) lowered growth of *E. huxleyi* relative to HNHP (Fig. 3a–d;  
633 Table 2). While the affinity of *E. huxleyi* for phosphate under different  $p\text{CO}_2$  levels  
634 has not been studied, the extra energetic cost of coping with stress from high  $p\text{CO}_2$   
635 could limit the energy available for the active uptake of phosphate. In addition, the  
636 activity of alkaline phosphatase, which might work to reuse released organic P,  
637 decreases at low pH (Rouco et al., 2013). Finally, the enlarged cell volume in HC and  
638 HNLP (or LNLP) conditions may further reduce nutrient uptake by cells due to  
639 reduced surface to volume ratios, and lower cell division rates (Fig. S5) (Finkel, 2001).  
640 While substantial evolutionary responses to multiple drivers may help further, our  
641 results imply that decreased phosphate availability along with progressive ocean  
642 acidification and warming in surface ocean may reduce the competitive capability of  
643 *E. huxleyi* in oligotrophic waters. Meanwhile, HNLP also affected expressions of  
644 genes related to nitrogen metabolism due to the tight stoichiometric coupling of  
645 nitrogen and phosphate metabolism (Rokitta et al., 2016). Decreased availability of  
646 nitrate further limited nitrogen metabolism of *E. huxleyi* (Rokitta et al., 2014), which  
647 lowered the overall biosynthetic activity and reduced cellular PON quotas (Fig. S10).

648 These explain the synergistic inhibitions of low-pH, low-phosphate and low-nitrate on  
649 growth of *E. huxleyi* (Fig. 3).

650 POC quotas and the cell-volume normalized POC quotas were larger at high  $p\text{CO}_2$   
651 than at low  $p\text{CO}_2$  under all treatments (Figs. 4; S6; Table 2), which could be a  
652 combined outcome of increased photosynthetic carbon fixation (Zondervan et al.,  
653 2002; Hoppe et al., 2011; Tong et al., 2019) and reduced cell division (present work),  
654 leading to pronounced increase of POC quotas in the cells grown under low phosphate  
655 (HNLP) and high  $p\text{CO}_2$  (Fig. 4). At HNLP and high  $p\text{CO}_2$  levels, photosynthetic  
656 carbon fixation proceeds whereas cell division rate decreases (Figs. 3 and 4), so  
657 reallocation of newly produced particulate organic carbon (POC) could be slowed  
658 down (Vaulot et al., 1987). In this case, over-synthesis of cellular organic carbon  
659 might be released as dissolved organic carbon (DOC), which can coagulate to  
660 transparent exopolymer particles (TEP) and attach to cells (Biermann and Engel, 2010;  
661 Engel et al., 2015). When cells were filtered on GF/F filters, any TEP would not have  
662 be separated from the cells and would have contributed to the measured POC quota in  
663 this study.

664 Large PIC quotas of coccolithophores may facilitate accumulation of calcium  
665 carbonate in the deep ocean and increase the contribution of  $\text{CaCO}_3$  produced by  
666 coccolithophores to calcareous ooze in the pelagic ocean (Hay, 2004). Due to  $\text{CaCO}_3$   
667 being more dense than organic carbon, larger PIC quotas may facilitate effective  
668 transport of POC to deep oceans, leading to vertical DIC or  $\text{CO}_2$  gradients of seawater  
669 (Milliman, 1993; Ziveri et al., 2007). While the effects of global ocean climate  
670 changes on physiological processes of phytoplankton can be complex, our results  
671 promote our understanding on how a cosmopolitan coccolithophore responds to future  
672 ocean environmental changes through plastic trait change.

673

674

675

676 *Data availability.* The data are available upon request to the corresponding author  
677 (Kunshan Gao).

678

679

680

681 *Author contributions.* YZ, KG designed the experiment. YZ performed this  
682 experiment. All authors analysed the data, wrote and improved the manuscript.

683

684

685

686 *Competing interests.* The authors declare that they have no conflict of interest.

687

688

689

690 *Acknowledgements.* This study was supported by National Natural Science  
691 Foundation of China (41720104005, 41806129, 41721005), and Joint Project of  
692 National Natural Science Foundation of China and Shandong province (No.  
693 U1606404).

694

695

696

697

698 **References**

- 699 Bach, L. T., Riebesell, U., and Schulz, K. G.: Distinguishing between the effects of  
700 ocean acidification and ocean carbonation in the coccolithophore *Emiliana*  
701 *huxleyi*, *Limnol. Oceanogr.*, 56, 2040–2050, doi: 10.4319/lo.2011.56.6.2040,  
702 2011.
- 703 Barton, A. D., Irwin, A. J., Finkel, Z. V., and Stock, C. A.: Anthropogenic climate  
704 change drives shift and shuffle in North Atlantic phytoplankton communities,  
705 *Proc. Nat. Aca. Sci. USA*, 113, 2964–2969, doi:10.1073/pnas.1519080113, 2016.
- 706 Berdalet, E., Roldán, C., Olivar, M. P., and Lysnes, K.: Quantifying RNA and DNA  
707 in planktonic organisms with SYBR Green II and nucleases. Part A.  
708 Optimisation of the assay, *Sci. Mar.*, 69, 1–16, doi: 10.3989/scimar.2005.69n11,  
709 2005.
- 710 Biermann, A., and Engel, A.: Effect of CO<sub>2</sub> on the properties and sinking velocity of  
711 aggregates of the coccolithophore *Emiliana huxleyi*, *Biogeosciences*, 7, 1017–  
712 1029, doi :10.5194/bg-7-1017-2010, 2010.
- 713 Blanco-Ameijeiras, S., Lebrato, M., Stoll, H. M., Iglesias-Rodriguez, D., Müller, M.  
714 N., Méndez-Vicente, A., and Oschlies, A.: Phenotypic variability in the  
715 coccolithophore *Emiliana huxleyi*, *Plos ONE*, 11, e0157697, doi:  
716 10.1371/journal.pone.0157697, 2016.
- 717 Borchard, C., Borges, A. V., Händel, N., and Engel, A.: Biogeochemical response of  
718 *Emiliana huxleyi* (PML B92/11) to elevated CO<sub>2</sub> and temperature under  
719 phosphorus limitation: A chemostat study, *J. Exp. Mar. Biol. Ecol.*, 410, 61–71,  
720 doi: 10.1016/j.jembe.2011.10.004, 2011.
- 721 Boyd, P. W., Collins, S., Dupont, S., Fabricius, K., Gattuso, J. P., Havenhand, J.,  
722 Hutchins, D. A., Riebesell, U., Rintoul, M. S., Vichi, M., Biswas, H., Ciotti, A.,

723 Gao, K., Gehlen, M., Hurd, C. L., Kurihara, H., McGraw, C. M., Navarro, J. M.,  
724 Nilsson, G. E., Passow, U., and Pörtner, H. O.: Experimental strategies to assess  
725 the biological ramifications of multiple drivers of global ocean change—A  
726 review, *Global Change Biol.*, 24, 2239–2261, doi: 10.1111/gcb.14102, 2018.

727 Boyd, P. W., Dillingham, P. W., McGraw, C. M., Armstrong, E. A., Cornwall, C. E.,  
728 Feng, Y., Hurd, C. L., Gault-Ringold, M., Roleda, M. Y., Timmins-Schiffman,  
729 E., and Nunn, B. L.: Physiological responses of a Southern Ocean diatom to  
730 complex future ocean conditions, *Nat. Clim. Change*, 6, 207–213, doi:  
731 10.1038/NCLIMATE2811, 2016.

732 Boyd, P. W., Lennartz, S. T., Glover, D. M., and Doney, S. C.: Biological  
733 ramifications of climate-change-mediated oceanic multi-stressors, *Nat. Clim.*  
734 *Change*, 5, 71–79, doi: 10.1038/nclimate2441, 2015.

735 Boyd, P. W., Strzepek, R., Fu, F., and Hutchins, D. A.: Environmental control of  
736 open-ocean phytoplankton groups: Now and in the future, *Limnol. Oceanogr.*, 55,  
737 1353–1376, doi: 10.4319/lo.2010.55.3.1353, 2010.

738 Brennan, G., and Collins, S.: Growth responses of a green alga to multiple  
739 environmental drivers, *Nat. Clim. Change*, 5, 892–897, doi:  
740 10.1038/nclimate2682, 2015.

741 Brennan, G., Colegrave, N., and Collins, S.: Evolutionary consequences of  
742 multidriver environmental change in an aquatic primary producer, *Proc. Nat. Aca.*  
743 *Sci. USA*, 114, 9930–9935, doi: 10.1073/pnas.1703375114, 2017.

744 Bretherton, L., Poulton, A. J., Lawson, T., Rukminasari, N., Balestreri, C., Schroeder,  
745 D., Mark Moore, C., and Suggett, D. J.: Day length as a key factor moderating  
746 the response of coccolithophore growth to elevated  $p\text{CO}_2$ , *Limnol. Oceanogr.*, 64,  
747 1284–1296, doi: 10.1002/lno.11115, 2019.

748 De Bodt, C., Van Oostende, N., Harlay, J., Sabbe, K., and Chou, L.: Individual and  
749 interacting effects of  $p\text{CO}_2$  and temperature on *Emiliana huxleyi* calcification:  
750 study of the calcite production, the coccolith morphology and the coccosphere  
751 size, *Biogeosciences*, 7, 1401–1412, doi: 10.5194/bg-7-1401-2010, 2010.

752 Dickson, A. G., Afghan, J. D., and Anderson, G. C.: Reference materials for oceanic  
753  $\text{CO}_2$  analysis: a method for the certification of total alkalinity, *Mar. Chem.*, 80,  
754 185–197, doi: 10.1016/S0304-4203(02)00133-0, 2003.

755 Dyhrman, S. T., and Palenik, B.: Characterization of ectoenzyme activity and  
756 phosphate-regulated proteins in the coccolithophorid *Emiliana huxleyi*, *J.*  
757 *Plankton Res.*, 25, 1215–1225, doi: 10.1093/plankt/fbg086, 2003.

758 Dyhrman, S. T.: Nutrients and their acquisition: phosphorus physiology in microalgae,  
759 in: *The physiology of microalgae*, edited by: Borowitzka, M. A., Beardall, J. and  
760 Raven, J. A., Springer, Heidelberg, 155–183, doi: 10.1007/978-3-319-24945-2,  
761 2016.

762 Engel, A., Borchard, C., Loginova, A. N., Meyer, J., Hauss, H., and Kiko, R.: Effects  
763 of varied nitrate and phosphate supply on polysaccharidic and proteinaceous gel  
764 particles production during tropical phytoplankton bloom experiments,  
765 *Biogeosciences*, 12, 5647–5665, doi: 10.5194/bg-12-5647-2015, 2015.

766 Feng, Y., Roleda, M. Y., Armstrong, E., Boyd, P. W., and Hurd., C. L.:  
767 Environmental controls on the growth, photosynthetic and calcification rates of a  
768 southern hemisphere strain of the coccolithophore *Emiliana huxleyi*, *Limnol.*  
769 *Oceanogr.*, 62, 519–540, doi: 10.1002/lno.10442, 2017.

770 Feng, Y., Warner, M. E., Zhang, Y., Sun, J., Fu, F., Rose, J. M., and Hutchins, D. A.:  
771 Interactive effects of increased  $p\text{CO}_2$ , temperature and irradiance on the marine

772 coccolithophore *Emiliana huxleyi* (Prymnesiophyceae), Eur. J. Phycol., 43, 87–  
773 98, doi: 10.1080/09670260701664674, 2008.

774 Fernández, E., Fritz, J. J., and Balch, W. M.: Chemical composition of the  
775 coccolithophorid *Emiliana huxleyi* under light-limited steady state growth. J.  
776 Exp. Mar. Biol. Ecol., 207, 149–160. doi: 10.1016/S0022-0981(96)02657-3,  
777 1996.

778 Finkel, Z. V.: Light absorption and size scaling of light-limited metabolism in marine  
779 diatoms, Limnol. Oceanogr., 46, 86–94, doi: 10.4319/lo.2001.46.1.0086, 2001.

780 Gafar, N. A., and Schulz, K. G.: A three-dimensional niche comparison of *Emiliana*  
781 *huxleyi* and *Gephyrocapsa oceanica*: reconciling observations with projections,  
782 Biogeosciences, 15, 3541–3560, doi: 10.5194/bg-15-3541-2018, 2018.

783 Gao, G., Xia, J., Yu, J., and Zeng, X.: Physiological response of a red tide alga  
784 (*Skeletonema costatum*) to nitrate enrichment, with special reference to inorganic  
785 carbon acquisition, Mar. Environ. Res., 133, 15–23, doi:  
786 10.1016/j.marenvres.2017.11.003, 2018.

787 Gao, K., Beardall, J., Häder, D. P., Hall-Spencer, J. M., Gao, G., and Hutchins, D. A.:  
788 Effects of ocean acidification on marine photosynthetic organisms under the  
789 concurrent influences of warming, UV radiation, and deoxygenation, Front. Mar.  
790 Sci., 6, 322, doi: 10.3389/fmars.2019.00322, 2019.

791 Gao, K., Ruan, Z., Villafañe, V. E., Gattuso, J., and Walter-Helbling, E.: Ocean  
792 acidification exacerbates the effect of UV radiation on the calcifying  
793 phytoplankton *Emiliana huxleyi*, Limnol. Oceanogr., 54, 1855–1862, doi:  
794 10.4319/lo.2009.54.6.1855, 2009.

795 Guan, W., and Gao, K.: Light histories influence the impacts of solar ultraviolet  
796 radiation on photosynthesis and growth in a marine diatom, *Skeletonema*



797 *costatum*, J. Photoch. Photobio. B., 91, 151–156, doi:  
798 10.1016/j.jphotobiol.2008.03.004, 2008.

799 Hansen, H. P., and Koroleff, F.: Determination of nutrients, in: Methods of seawater  
800 analysis, edited by: Grasshoff, K., Kremling, K. and Ehrhardt, M., WILEY-VCH  
801 Publishers, ISBN: 3-527-29589-5, 1999.

802 Hay, W. W.: Carbonate fluxes and calcareous nannoplankton, in: Coccolithophores:  
803 from molecular biology to global impact, edited by: Thierstein, H. R. and Young,  
804 J. R., Springer, Berlin, 509–528, 2004.

805 Hoppe, C. J. M., Langer, G., and Rost, B.: *Emiliana huxleyi* shows identical  
806 responses to elevated pCO<sub>2</sub> in TA and DIC manipulations, J. Exp. Mar. Biol.  
807 Ecol., 406, 54–62, doi: 10.1016/j.jembe.2011.06.008, 2011.

808 Jin, P., Ding, J. C., Xing, T., Riebesell, U., and Gao, K. S.: High levels of solar  
809 radiation offset impacts of ocean acidification on calcifying and non-calcifying  
810 strains of *Emiliana huxleyi*, Mar. Ecol. Prog. Ser., 568, 47–58, doi:  
811 10.3354/meps12042, 2017.

812 Kottmeier, D. M., Rokitta, S. D., and Rost, B.: Acidification, not carbonation, is the  
813 major regulator of carbon fluxes in the coccolithophore *Emiliana huxleyi*, New  
814 Phytol., 211, 126–137, doi: 10.1111/nph.13885, 2016.

815 Krumhardt, K. M., Lovenduski, N. S., Iglesias-Rodriguez, M. D., and Kleypas, J. A.:  
816 Coccolithophore growth and calcification in a changing ocean, Prog. Oceanogr.,  
817 171, 276–295, doi: 10.1016/j.pocean.2017.10.007, 2017.

818 Krumhardt, K. M., Lovenduski, N. S., Freeman, N. M., and Bates, N. R.: Apparent  
819 increase in coccolithophore abundance in the subtropical North Atlantic from  
820 1990 to 2014, Biogeosciences, 13, 1163–1177, doi: 10.5194/bg-13-1163-2016,  
821 2016.

822 Kwiatkowski, L., Aumont, O., and Bopp, L.: Consistent trophic amplification of  
823 marine biomass declines under climate change, *Glob. Change Biol.*, 25, 218–229,  
824 doi: 10.1111/gcb.14468, 2019.

825 Lakeman, M. B., von Dassow, P., and Cattolico, R. A.: The strain concept in  
826 phytoplankton ecology, *Harmful Algae*, 8, 746–758, doi:  
827 10.1016/j.hal.2008.11.011, 2009.

828 Langer, G., Nehrke, G., Probert, I., Ly, J., and Ziveri, P.: Strain-specific responses of  
829 *Emiliana huxleyi* to changing seawater carbonate chemistry, *Biogeosciences*, 6,  
830 2637–2646, doi: 10.5194/bg-6-2637-2009.

831 Larsen, A., Flaten, G. A. F., Sandaa, R., Castberg, T., Thyrraug, R., Erga, S. R.,  
832 Jacquet, S., and Bratbak, G.: Spring phytoplankton bloom dynamics in  
833 Norwegian coastal waters: Microbial community succession and diversity,  
834 *Limnol. Oceanogr.*, 49, 180–190, doi: 10.4319/lo.2004.49.1.0180, 2004.

835 Leonardos, N., and Geider, R. J.: Elevated atmospheric carbon dioxide increases  
836 organic carbon fixation by *Emilinia huxleyi* (haptophyta), under nutrient-limited  
837 high-light conditions, *J. Phycol.*, 41, 1196–1203, doi: 10.1111/j.1529-  
838 8817.2005.00152.x, 2005.

839 Li, W., Yang, Y., Li, Z., Xu, J., and Gao, K.: Effects of seawater acidification on the  
840 growth rates of the diatom *Thalassiosira (Conticribra) weissflogii* under  
841 different nutrient, light and UV radiation regimes, *J. Appl. Phycol.*, 29, 133–142,  
842 doi: 10.1007/s10811-016-0944-y, 2017.

843 Locarnini, R. A., Mishonov, A. V., Antonov, J. I., Boyer, T. P., and Garcia, H. E.:  
844 World ocean atlas 2005, V. 1: Temperature, edited by: Levitus, S., NOAA Atlas  
845 NESDIS 61. U. S. Government Printing Office, 123–134, 2006.

846 Matthiessen, B., Eggers, S. L., and Krug, S. A.: High nitrate to phosphorus regime  
847 attenuates negative effects of rising  $p\text{CO}_2$  on total population carbon  
848 accumulation, *Biogeosciences*, 9, 1195–1203, doi: 10.5194/bg-9-1195-2012,  
849 2012.

850 McKew, B. A., Metodieva, G., Raines, C. A., Metodiev, M. V., and Geider, R. J.:  
851 Acclimation of *Emiliana huxleyi* (1516) to nutrient limitation involves precise  
852 modification of the proteome to scavenge alternative sources of N and P, *Environ.*  
853 *Microbiol.*, 17, 1–13, doi: 10.1111/1462-2920.12957, 2015.

854 Meyer, J., and Riebesell, U.: Reviews and syntheses: response of coccolithophores to  
855 ocean acidification: a meta-analysis, *Biogeosciences*, 12, 1671–1682, doi:  
856 10.5194/bg-12-1671-2015, 2015.

857 Milliman, J. D.: Production and accumulation of calcium carbonate in the ocean:  
858 budget of a nonsteady state, *Global Biogeochem. Cy.*, 7, 927–957, doi:  
859 10.1029/93GB02524, 1993.

860 Monteiro, F. M., Bach, L. T., Brownlee, C., Bown, P., Rickaby, R. E. M., Poulton, A.  
861 J., Tyrrell, T., Beaufort, L., Dutkiewicz, S., Gibbs, S., Gutowska, M. A., Lee, R.,  
862 Riebesell, U., Young, J., and Ridgwell, A.: Why marine phytoplankton calcify,  
863 *Sci. Adv.*, 2, 1–14, doi: 10.1126/sciadv.1501822, 2016.

864 Müller, M. N., Antia, A. N., and LaRoche, J.: Influence of cell cycle phase on  
865 calcification in the coccolithophore *Emiliana huxleyi*, *Limnol. Oceanogr.*, 53,  
866 506–512, doi: 10.4319/lo.2008.53.2.0506, 2008.

867 Müller, M. N., Beaufort, L., Bernard, O., Pedrotti, M. L., Talec, A., and Sciandra, A.:  
868 Influence of  $\text{CO}_2$  and nitrogen limitation on the coccolith volume of *Emiliana*  
869 *huxleyi* (Haptophyta), *Biogeosciences*, 9, 4155–4167, doi: 10.5194/bg-9-4155-  
870 2012, 2012.

871 Müller, M. N., Trull, T. W., and Hallegraeff, G. M.: Independence of nutrient  
872 limitation and carbon dioxide impacts on the Southern Ocean coccolithophore  
873 *Emiliana huxleyi*, *The ISME J.*, 11, 1777–1787, doi: 10.1038/ismej.2017.53,  
874 2017.

875 Nimer, N. A., and Merrett, M. J.: Calcification rate in *Emiliana huxleyi* Lohmann in  
876 response to light, nitrate and availability of inorganic carbon, *New Phytol.*, 123,  
877 673–677, doi: 10.1111/j.1469-8137.1993.tb03776.x, 1993.

878 Omar, A. M., Olsen, A., Johannessen, T., Hoppema, M., Thomas, H., and Borges, A.  
879 V.: Spatiotemporal variations of  $f\text{CO}_2$  in the North Sea, *Ocean Sci.*, 6, 77–89, doi:  
880 10.5194/osd-6-1655-2009, 2010.

881 Perrin, L., Probert, I., Langer, G., and Aloisi, G.: Growth of the coccolithophore  
882 *Emiliana huxleyi* in light- and nutrient-limited batch reactors: relevance for the  
883 BIOSOPE deep ecological niche of coccolithophores, *Biogeosciences*, 13, 5983–  
884 6001, doi: 10.5194/bg-13-5983-2016, 2016.

885 Pierrot, D., Lewis, E., and Wallace, D. W. R.: MS Excel program developed for CO<sub>2</sub>  
886 system calculations, ORNL/CDIAC-105, Carbon Dioxide Information Analysis  
887 Centre, Oak Ridge National Laboratory, U.S., Department of Energy, doi:  
888 10.3334/CDIAC/otg.CO2SYS\_XLS\_CDIAC105a, 2006.

889 R version 3.5.0.: The R foundation for statistical computing platform: x86\_64-w64-  
890 mingw32/x64, 2018.

891 Riebesell, U., and Gattuso, J. P.: Lessons learned from ocean acidification research,  
892 *Nat. Clim. Change*, 5, 12–14, doi: 10.1038/nclimate2456, 2015.

893 Riebesell, U., and Tortell, P. D.: Effects of ocean acidification on pelagic organisms  
894 and ecosystems, in: *Ocean acidification*, edited by: Gattuso, J. P. and Hansson, L.,  
895 Oxford University Press, 99–121, 2011.

896 Riegman, R., Stolte, W., Noordeloos, A. A. M., and Slezak, D.: Nutrient uptake and  
897 alkaline phosphatase (EC 3:1:3:1) activity of *Emiliana huxleyi*  
898 (Prymnesiophyceae) during growth under N and P limitation in continuous  
899 cultures, *J. Phycol.*, 36, 87–96, doi: 10.1046/j.1529-8817.2000.99023.x, 2000.

900 Rivero-Calle, S., Gnanadesikan, A., Del Castillo, C. E., Balch, W. M., and Guikema,  
901 S. D.: Multidecadal increase in North Atlantic coccolithophores and the potential  
902 role of rising CO<sub>2</sub>, *Science*, 350, 1533–1537, doi: 10.1126/science.aaa8026, 2015.

903 Rokitta, S. D., von Dassow, P., Rost, B., and John, U.: *Emiliana huxleyi* endures N-  
904 limitation with an efficient metabolic budgeting and effective ATP synthesis,  
905 *BMC Genomics*, 15, 1051–1064, doi: 10.1186/1471-2164-15-1051, 2014.

906 Rokitta, S. D., von Dassow, P., Rost, B., and John, U.: P- and N-depletion trigger  
907 similar cellular responses to promote senescence in eukaryotic phytoplankton,  
908 *Front. Mar. Sci.*, 3, 109, doi: 10.3389/fmars.2016.00109, 2016.

909 Rosas-Navarro, A., Langer, G., and Ziveri, P.: Temperature affects the morphology  
910 and calcification of *Emiliana huxleyi* strains, *Biogeosciences*, 13, 2913–2926,  
911 doi: 10.5194/bg-13-2913-2016, 2016.

912 Rost, B., and Riebesell, U.: Coccolithophores and the biological pump: responses to  
913 environmental changes, in: *Coccolithophores : from molecular biology to global*  
914 *impact*, edited by: Thierstein, H. R. and Young, J. R., Springer, Berlin, 99–125,  
915 2004.

916 Rost, B., Zondervan, I., and Riebesell, U.: Light-dependent carbon isotope  
917 fractionation in the coccolithophorid *Emiliana huxleyi*, *Limnol. Oceanogr.*, 47,  
918 120–128, doi: 10.2307/3069125, 2002

919 Rouco, M., Branson, O., Lebrato, M., and Iglesias-Rodríguez, M.: The effect of  
920 nitrate and phosphate availability on *Emiliana huxleyi* (NZEH) physiology

921 under different CO<sub>2</sub> scenarios, *Front. Microbiol.*, 4, 1–11, doi:  
922 10.3389/fmicb.2013.00155, 2013.

923 Roy, R. N., Roy, L. N., Vogel, K. M., Porter-Moore, C., Pearson, T., Good, C. E.,  
924 Millero, F. J., and Campbell, D. C.: Thermodynamics of the dissociation of boric  
925 acid in seawater at S 5 35 from 0 degrees C to 55 degrees C, *Mar. Chem.*, 44,  
926 243–248, doi: 10.1016/0304-4203(93)90206-4, 1993.

927 Schaum, E., Rost, B., Millar, A. J., and Collins, S.: Variation in plastic responses of a  
928 globally distributed picoplankton species to ocean acidification, *Nat. Clim.*  
929 *Change*, 3, 298–302, doi: 10.1038/NCLIMATE1774, 2013.

930 Sett, S., Bach, L. T., Schulz, K. S., Koch-Klavsen, S., Lebrato, M., and Riebesell, U.:  
931 Temperature modulates coccolithophorid sensitivity of growth, photosynthesis  
932 and calcification to increasing seawater pCO<sub>2</sub>, *PLoS One*, 9(2), e88308, doi:  
933 10.1371/journal.pone.0088308, 2014.

934 Sunda, W. G., Price, N. M., and Morel, F. M. M.: Trace metal ion buffers and their  
935 use in culture studies, in: *Algal culturing techniques*, edited by: Andersen, R. A.,  
936 Elsevier Academic Press, 53–59, 2005.

937 Thomas, M. K., Aranguren-Gassis, M., Kremer, C. T., Gould, M. R., Anderson, K.,  
938 Klausmeier, C. A., Litchman, E.: Temperature-nutrient interactions exacerbate  
939 sensitivity to warming in phytoplankton, *Global Change Biol.*, 23, 3269–3280,  
940 doi: 10.1111/gcb.13641, 2017.

941 Tong, S., Hutchins, D., and Gao, K.: Physiological and biochemical responses of  
942 *Emiliania huxleyi* to ocean acidification and warming are modulated by UV  
943 radiation, *Biogeosciences*, 16, 561–572, doi: 10.5194/bg-16-561-2019, 2019.

944 Tong, S., Hutchins, D., Fu, F., and Gao, K.: Effects of varying growth irradiance and  
945 nitrogen sources on calcification and physiological performance of the

946 coccolithophore *Gephyrocapsa oceanica* grown under nitrogen limitation,  
947 *Limnol. Oceanogr.*, 61, 2234–2242, doi: 10.1002/lno.10371, 2016.

948 Vaultot, D., Olson, R. J., Merkel, S., and Chisholm, S. E.: Cell-cycle response to  
949 nutrient starvation in two phytoplankton species, *Thalassiosira weissflogii* and  
950 *Hymenomonas carterae*, *Mar. Biol.*, 95, 625–630, doi: 10.1007/BF00393106,  
951 1987.

952 Xu, J., Gao, K., Li, Y., and Hutchins, D. A.: Physiological and biochemical responses  
953 of diatoms to projected ocean changes, *Mar. Ecol. Prog. Ser.*, 515, 73–81, doi:  
954 10.3354/meps11026, 2014b.

955 Xu, K., Fu, F., and Hutchins, D. A.: Comparative responses of two dominant  
956 Antarctic phytoplankton taxa to interactions between ocean acidification,  
957 warming, irradiance, and iron availability, *Limnol. Oceanogr.*, 59, 1919–1931,  
958 doi: 10.4319/lo.2014.59.6.1919, 2014a.

959 Xu, K., and Gao, K.: Reduced calcification decreases photoprotective capability in the  
960 coccolithophorid *Emiliana huxleyi*, *Plant Cell Physiol.*, 53, 1267–1274, doi:  
961 10.1093/pcp/pcs066, 2012.

962 Xu, K., Gao, K., Villafañe, V. E., and Helbling, E. W.: Photosynthetic responses of  
963 *Emiliana huxleyi* to UV radiation and elevated temperature: roles of calcified  
964 coccoliths, *Biogeosciences*, 8, 1441–1452, doi: 10.5194/bg-8-1441-2011, 2011.

965 Zhang, Y., Bach, L. T., Lohbeck, K. T., Schulz K. G., Listmann, L., Klapper R., and  
966 Riebesell, U.: Population-specific responses in physiological rates of *Emilinia*  
967 *huxleyi* to a broad CO<sub>2</sub> range, *Biogeosciences*, 15, 3691–3701, doi: 10.5194/bg-  
968 15-3691-2018, 2018.

969 Zhang, Y., Fu, F., Hutchins, D. A., and Gao, K.: Combined effects of CO<sub>2</sub> level, light  
970 intensity and nutrient availability on the coccolithophore *Emiliana huxleyi*,  
971 *Hydrobiologia*, 842, 127–141, doi: 10.1007/s10750-019-04031-0, 2019.

972 Zhang, Y., Klapper, R., Lohbeck, K. T., Bach, L. T., Schulz, K. G., Reusch, T. B. H.,  
973 and Riebesell, U.: Between- and within-population variations in thermal reaction  
974 norms of the coccolithophore *Emiliana huxleyi*, *Limnol. Oceanogr.*, 59, 1570–  
975 1580, doi: 10.4319/lo.2014.59.5.1570, 2014.

976 Ziveri, P., deBernardi, B., Baumann, K., Stoll, H. M., and Mortyn, P. G.: Sinking of  
977 coccolith carbonate and potential contribution to organic carbon ballasting in the  
978 deep ocean, *Deep Sea Res.*, 54, 659–675, doi: 10.1016/j.dsr2.2007.01.006, 2007.

979 Zondervan, I., Rost, B., and Riebesell, U.: Effect of CO<sub>2</sub> concentration on the  
980 PIC/POC ratio in the coccolithophore *Emiliana huxleyi* grown under light-  
981 limiting conditions and different daylengths, *J. Exp. Mar. Biol. Ecol.*, 272, 55–70,  
982 doi: 10.1016/s0022-0981(02)00037-0, 2002.

983

984

985

986

987

988

989

990

991

992

993



994 **Figure Legends**

995 **Figure 1.** Four “baseline” environments were used where  $p\text{CO}_2$  and temperature  
996 (temp) were combined in all pairwise combinations: low  $p\text{CO}_2$  + low temp (LCLT,  
997  $\triangle$ ), high  $p\text{CO}_2$  + low temp (HCLT,  $*$ ), low  $p\text{CO}_2$  + high temp (LCHT,  $\square$ ) and high  
998  $p\text{CO}_2$  + high temp (HCHT,  $\circ$ ). Additional stressors were then added to each of the  
999 four “baseline” environments. In step 1, low light (LL) was supplied. In step 2, high  
1000 light (HL) was supplied. HL was then maintained for the rest of the experiment. In  
1001 step 3, low nitrogen was supplied and high phosphate levels were restored (LNHP). In  
1002 step 4, low phosphate was supplied and high nitrogen levels were restored (HNLP). In  
1003 step 5, both nitrogen and phosphate were low (LNLP). Experimental steps were done  
1004 in a consecutive manner. At each step, we measured cell concentration (**a–e**), medium  
1005  $\text{pH}_T$  value (**f–j**), medium  $p\text{CO}_2$  level (**k–o**), dissolved inorganic nitrogen (DIN) (**p–t**)  
1006 and phosphate (DIP) (**u–y**) concentrations in the media in the beginning and at the end  
1007 of the incubations. Respectively, LC and HC represent  $p\text{CO}_2$  levels of about 370 and  
1008 960  $\mu\text{atm}$ ; LT and HT 16 and 20  $^\circ\text{C}$ ; LL and HL 60 and 240  $\mu\text{mol photons m}^{-2} \text{s}^{-1}$  of  
1009 photosynthetically active radiation (PAR); HN and LN 24.3 and 7.8  $\mu\text{mol L}^{-1} \text{NO}_3^-$  at  
1010 the beginning of the incubation; HP and LP 1.5 and 0.5  $\mu\text{mol L}^{-1} \text{PO}_4^{3-}$  at the  
1011 beginning of the incubations. The samples were taken in the last day of the cultures in  
1012 each treatment. The values were indicated as the means  $\pm$  sd of 4 replicate populations  
1013 for each treatment.

1014

1015 **Figure 2.** Growth rate (**a**), particulate organic (POC, **b**) and inorganic (PIC, **c**) carbon  
1016 quotas, PIC / POC value (**d**) and cell volume (**e**) of *Emiliana huxleyi* grown under the  
1017 present (defined as low levels of  $p\text{CO}_2$ , temperature and light along with high levels  
1018 of nutrients) and the future (defined as higher levels of  $p\text{CO}_2$ , temperature, and light

1019 along with low levels of nutrients due to ocean acidification, warming and shoaling of  
1020 upper mixing layer) scenarios. Data were obtained after cells were acclimated to  
1021 experimental conditions for 14–16 generations and means  $\pm$  sd of 4 replicate  
1022 populations. Different letters (a, b) in each panel represent significant differences  
1023 between future and present ocean conditions (Tukey Post hoc,  $p < 0.05$ ).

1024

1025 **Figure 3.** Growth rates of *E. huxleyi* grown in LCLT (a), HCLT (b), LCHT (c) and  
1026 HCHT (d) conditions, and the ratio of growth rate at HC to LC (e), HT to LT (f),  
1027 HCHT to LCLT (g), LNHP to HNHP (h), HNLP to HNHP (i) and LNLN to HNHP (j).  
1028 Data were obtained after cells were acclimated to experimental conditions for 14–16  
1029 generations and means  $\pm$  sd of 4 replicate populations. Horizontal lines in panels (e)–  
1030 (j) showed the value of 1. Different letters (a, b, c, d) in panels (a)–(d) represent  
1031 significant differences between different nutrient treatments (Tukey Post hoc,  $p <$   
1032 0.05). The results shown in the black column were used for the ambient-future  
1033 comparison in figure 2. Detailed experimental conditions were shown in Figure 1.

1034

1035 **Figure 4.** POC quota of *E. huxleyi* grown in LCLT (a), HCLT (b), LCHT (c) and  
1036 HCHT (d) conditions, and the ratio of POC quota at HC to LC (e), HT to LT (f),  
1037 HCHT to LCLT (g), LNHP to HNHP (h), HNLP to HNHP (i) and LNLN to HNHP (j).  
1038 Data were obtained after cells were acclimated to experimental conditions for 14–16  
1039 generations and means  $\pm$  sd of 4 replicate populations. Horizontal lines in panels (e)–  
1040 (j) showed the value of 1. Different letters (a, b) in panels (a)–(d) represent significant  
1041 differences between different nutrient treatments (Tukey Post hoc,  $p < 0.05$ ). The  
1042 results shown in the black column were used for the ambient-future comparison in  
1043 figure 2. Detailed experimental conditions were shown in Figure 1.

1044

1045 **Figure 5.** PIC quota of *E. huxleyi* grown in LCLT (a), HCLT (b), LCHT (c) and  
1046 HCHT (d) conditions, and the ratio of PIC quota at HC to LC (e), HT to LT (f),  
1047 HCHT to LCLT (g), LNHP to HNHP (h), HNLP to HNHP (i) and LNLP to HNHP (j).  
1048 Data were obtained after cells were acclimated to experimental conditions for 14–16  
1049 generations and means  $\pm$  sd of 4 replicate populations. Horizontal lines in panels (e)–  
1050 (j) showed the value of 1. Different letters (a, b, c) in panels (a)–(d) represent  
1051 significant differences between different nutrient treatments (Tukey Post hoc,  $p <$   
1052 0.05). The results shown in the black column were used for the ambient-future  
1053 comparison in figure 2. Detailed experimental conditions were shown in Figure 1.

1054

1055 **Figure 6.** PIC / POC value of *E. huxleyi* grown in LCLT (a), HCLT (b), LCHT (c)  
1056 and HCHT (d) conditions, and the ratio of (PIC / POC value) at HC to LC (e), HT to  
1057 LT (f), HCHT to LCLT (g), LNHP to HNHP (h), HNLP to HNHP (i) and LNLP to  
1058 HNHP (j). Data were obtained after cells were acclimated to experimental conditions  
1059 for 14–16 generations and means  $\pm$  sd of 4 replicate populations. Horizontal lines in  
1060 panels (e)–(j) showed the value of 1. Different letters (a, b, c) in panels (a)–(d)  
1061 represent significant differences between different nutrient treatments (Tukey Post  
1062 hoc,  $p <$  0.05). The results shown in the black column were used for the ambient-  
1063 future comparison in figure 2. Detailed experimental conditions were shown in Figure  
1064 1.

1065

1066 **Figure S1.** Flow chart of the experimental processes. Experimental steps were done in  
1067 a consecutive manner. Detailed experimental conditions were shown in Figure 1.

1068

1069 **Figure S2.** Representative curves for the time course for cell concentrations of *E.*  
1070 *huxleyi* under low  $p\text{CO}_2$  (LC), high (HT) or low (LT) temperatures, and high light  
1071 (HL) conditions with varying levels of nutrients: HNHP (a), LNHP (b), HNLP (c) and  
1072 LNLP (d), respectively. Arrow indicates the day when samples were taken in each  
1073 treatment. Data were means  $\pm$  sd of 4 replicate populations. Detailed experimental  
1074 conditions were shown in Figure 1.

1075

1076 **Figure S3.** Comparison of growth rate (a), POC quota (b) and PIC quota (c) between  
1077 the expected (calculated) values and the measured values under the LNLP treatments.  
1078 Different letters (a, b) in each “baseline” environment (LCLT, HCLT, LCHT or  
1079 HCHT) represent significant differences (Tukey Post hoc,  $p < 0.05$ ). Detailed  
1080 experimental conditions were shown in Figure 1.

1081

1082 **Figure S4.** Heatmap of the changes in growth rate, POC quota, PIC quota and  
1083 PIC:POC in each treatment. Values in the present scenario (LC LT LL HNHP) were  
1084 considered as the control. A minus sign indicates the reduction in these parameters.

1085

1086 **Figure S5.** Cell volume of *E. huxleyi* grown in LCLT (a), HCLT (b), LCHT (c) and  
1087 HCHT (d) conditions, and its correlation with POC quota (e) and PIC quota (f). Data  
1088 were obtained after cells were acclimated to experimental conditions for 14–16  
1089 generations and means  $\pm$  sd of 4 replicate populations in panels (a)–(d). Each point in  
1090 panels (e) and (f) indicates an individual replicate from all experiment. Different  
1091 letters (a, b, c) in panels (a)–(d) represent significant differences between different  
1092 nutrient treatments (Tukey Post hoc,  $p < 0.05$ ).

1093

1094 **Figure S6.** Normalized POC quota of *E. huxleyi* to cell volume in LCLT (a), HCLT  
1095 (b), LCHT (c) and HCHT (d) conditions. Data were obtained after cells were  
1096 acclimated to experimental conditions for 14–16 generations and means  $\pm$  sd of 4  
1097 replicate populations. Different letters (a, b) in each panel represent significant  
1098 differences between different nutrient treatments (Tukey Post hoc,  $p < 0.05$ ).

1099

1100 **Figure S7.** Normalized PIC quota of *E. huxleyi* to cell volume in LCLT (a), HCLT  
1101 (b), LCHT (c) and HCHT (d) conditions. Data were obtained after cells were  
1102 acclimated to experimental conditions for 14–16 generations and means  $\pm$  sd of 4  
1103 replicate populations. Different letters (a, b, c) in each panel represent significant  
1104 differences between different nutrient treatments (Tukey Post hoc,  $p < 0.05$ ).

1105

1106 **Figure S8.** POC production rate of *E. huxleyi* in LCLT (a), HCLT (b), LCHT (c) and  
1107 HCHT (d) conditions, and the ratio of POC production rate at HC to LC (e), HT to LT  
1108 (f), HCHT to LCLT (g), LNHP to HNHP (h), HNLP to HNHP (i) and LNLP to  
1109 HNHP (j). Data were obtained after cells were acclimated to experimental conditions  
1110 for 14–16 generations and means  $\pm$  sd of 4 replicate populations. Horizontal lines in  
1111 panels (e)–(j) showed the value of 1. Different letters (a, b, c) in panels (a)–(d)  
1112 represent significant differences between different nutrient treatments (Tukey Post  
1113 hoc,  $p < 0.05$ ).

1114

1115 **Figure S9.** PIC production rate of *E. huxleyi* in LCLT (a), HCLT (b), LCHT (c) and  
1116 HCHT (d) conditions, and the ratio of PIC production rate at HC to LC (e), HT to LT  
1117 (f), HCHT to LCLT (g), LNHP to HNHP (h), HNLP to HNHP (i) and LNLP to  
1118 HNHP (j). Data were obtained after cells were acclimated to experimental conditions

1119 for 14–16 generations and means  $\pm$  sd of 4 replicate populations. Horizontal lines in  
1120 panels (e)–(j) showed the value of 1. Different letters (a, b, c) in panels (a)–(d)  
1121 represent significant differences between different nutrient treatments (Tukey Post  
1122 hoc,  $p < 0.05$ ).

1123

1124 **Figure S10.** PON quota of *E. huxleyi* in LCLT (a), HCLT (b), LCHT (c) and HCHT  
1125 (d) conditions, and the ratio of PON quota at HC to LC (e), HT to LT (f), HCHT to  
1126 LCLT (g), LNHP to HNHP (h), HNLP to HNHP (i) and LNLP to HNHP (j). Data  
1127 were obtained after cells were acclimated to experimental conditions for 14–16  
1128 generations and means  $\pm$  sd of 4 replicate populations. Horizontal lines in panels (e)–  
1129 (j) showed the value of 1. Different letters (a, b) in panels (a)–(d) represent significant  
1130 differences between different nutrient treatments (Tukey Post hoc,  $p < 0.05$ ).

1131

1132 **Figure S11.** Normalized RNA quota of *E. huxleyi* to POC quota in HNHP and HNLP  
1133 conditions. Data were obtained after cells were acclimated to experimental conditions  
1134 for 14–16 generations and means  $\pm$  sd of 4 replicate populations. Different letters (a, b)  
1135 represent significant differences between different nutrient treatments (Tukey Post  
1136 hoc,  $p < 0.05$ ).

1137

1138

1139 **Table 1.** Carbonate chemistry parameters at the end of the incubation. The values are  
 1140 means  $\pm$  sd of 4 replicate populations. LL and HL represent 60 and 240  $\mu\text{mol photons}$   
 1141  $\text{m}^{-2} \text{ s}^{-1}$  of photosynthetically active radiation (PAR), respectively; HN and LN  
 1142 represent 24.3 and 7.8  $\mu\text{mol L}^{-1}$  DIN in the beginning of the incubation; HP and LP  
 1143 represent 1.5 and 0.5  $\mu\text{mol L}^{-1}$  DIP in the beginning of the incubation, respectively.

|      |      |               | $p\text{CO}_2$<br>( $\mu\text{atm}$ ) | pH<br>(total<br>scale) | TA<br>( $\mu\text{mol}$<br>$\text{L}^{-1}$ ) | DIC<br>( $\mu\text{mol}$<br>$\text{L}^{-1}$ ) | $\text{HCO}_3^-$<br>( $\mu\text{mol}$<br>$\text{L}^{-1}$ ) | $\text{CO}_3^{2-}$<br>( $\mu\text{mol}$<br>$\text{L}^{-1}$ ) | $\text{CO}_2$<br>( $\mu\text{mol}$<br>$\text{L}^{-1}$ ) |
|------|------|---------------|---------------------------------------|------------------------|----------------------------------------------|-----------------------------------------------|------------------------------------------------------------|--------------------------------------------------------------|---------------------------------------------------------|
| 16   | LL-  | LC            | 371 $\pm$ 17                          | 8.07 $\pm$ 0.02        | 2266 $\pm$ 19                                | 2017 $\pm$ 9                                  | 1823 $\pm$ 6                                               | 180 $\pm$ 8                                                  | 13.4 $\pm$ 0.6                                          |
|      | HNHP | HC            | 918 $\pm$ 21                          | 7.73 $\pm$ 0.02        | 2248 $\pm$ 45                                | 2149 $\pm$ 39                                 | 2027 $\pm$ 35                                              | 90 $\pm$ 5                                                   | 33.3 $\pm$ 0.7                                          |
|      | HL-  | LC            | 387 $\pm$ 22                          | 8.06 $\pm$ 0.02        | 2297 $\pm$ 12                                | 2050 $\pm$ 17                                 | 1857 $\pm$ 20                                              | 179 $\pm$ 6                                                  | 14.0 $\pm$ 0.8                                          |
|      | HNHP | HC            | 972 $\pm$ 11                          | 7.71 $\pm$ 0.01        | 2283 $\pm$ 34                                | 2189 $\pm$ 31                                 | 2066 $\pm$ 29                                              | 88 $\pm$ 3                                                   | 35.2 $\pm$ 0.4                                          |
|      | HL-  | LC            | 393 $\pm$ 20                          | 8.05 $\pm$ 0.02        | 2273 $\pm$ 9                                 | 2033 $\pm$ 3                                  | 1845 $\pm$ 9                                               | 174 $\pm$ 7                                                  | 14.3 $\pm$ 0.7                                          |
|      | LNHP | HC            | 1012 $\pm$ 13                         | 7.69 $\pm$ 0.01        | 2263 $\pm$ 28                                | 2177 $\pm$ 25                                 | 2057 $\pm$ 24                                              | 84 $\pm$ 2                                                   | 36.7 $\pm$ 0.5                                          |
|      | HL-  | LC            | 395 $\pm$ 19                          | 8.06 $\pm$ 0.02        | 2318 $\pm$ 5                                 | 2073 $\pm$ 12                                 | 1879 $\pm$ 16                                              | 179 $\pm$ 6                                                  | 14.3 $\pm$ 0.7                                          |
|      | HNLP | HC            | 958 $\pm$ 63                          | 7.70 $\pm$ 0.01        | 2205 $\pm$ 69                                | 2117 $\pm$ 71                                 | 1999 $\pm$ 69                                              | 84 $\pm$ 1                                                   | 34.7 $\pm$ 2.3                                          |
|      | HL-  | LC            | 375 $\pm$ 24                          | 8.06 $\pm$ 0.01        | 2181 $\pm$ 78                                | 1947 $\pm$ 77                                 | 1767 $\pm$ 73                                              | 167 $\pm$ 3                                                  | 13.6 $\pm$ 0.9                                          |
| LNLP | HC   | 1014 $\pm$ 46 | 7.68 $\pm$ 0.01                       | 2198 $\pm$ 73          | 2118 $\pm$ 73                                | 2002 $\pm$ 69                                 | 79 $\pm$ 2                                                 | 36.7 $\pm$ 1.7                                               |                                                         |
| 20   | LL-  | LC            | 349 $\pm$ 16                          | 8.09 $\pm$ 0.02        | 2257 $\pm$ 14                                | 1963 $\pm$ 4                                  | 1741 $\pm$ 6                                               | 210 $\pm$ 8                                                  | 11.3 $\pm$ 0.5                                          |
|      | HNHP | HC            | 899 $\pm$ 40                          | 7.74 $\pm$ 0.02        | 2257 $\pm$ 53                                | 2130 $\pm$ 45                                 | 1994 $\pm$ 40                                              | 107 $\pm$ 7                                                  | 29.0 $\pm$ 1.3                                          |
|      | HL-  | LC            | 363 $\pm$ 11                          | 8.08 $\pm$ 0.01        | 2281 $\pm$ 16                                | 1990 $\pm$ 18                                 | 1770 $\pm$ 19                                              | 208 $\pm$ 2                                                  | 11.7 $\pm$ 0.3                                          |
|      | HNHP | HC            | 947 $\pm$ 24                          | 7.72 $\pm$ 0.01        | 2248 $\pm$ 21                                | 2130 $\pm$ 19                                 | 1998 $\pm$ 18                                              | 102 $\pm$ 3                                                  | 30.6 $\pm$ 0.8                                          |
|      | HL-  | LC            | 362 $\pm$ 18                          | 8.08 $\pm$ 0.02        | 2262 $\pm$ 12                                | 1973 $\pm$ 13                                 | 1756 $\pm$ 16                                              | 206 $\pm$ 7                                                  | 11.7 $\pm$ 0.6                                          |
|      | LNHP | HC            | 970 $\pm$ 10                          | 7.71 $\pm$ 0.01        | 2271 $\pm$ 31                                | 2155 $\pm$ 28                                 | 2021 $\pm$ 25                                              | 102 $\pm$ 3                                                  | 31.4 $\pm$ 0.3                                          |
|      | HL-  | LC            | 370 $\pm$ 14                          | 8.08 $\pm$ 0.01        | 2314 $\pm$ 3                                 | 2023 $\pm$ 10                                 | 1800 $\pm$ 14                                              | 211 $\pm$ 4                                                  | 12.0 $\pm$ 0.4                                          |
|      | HNLP | HC            | 946 $\pm$ 47                          | 7.71 $\pm$ 0.01        | 2200 $\pm$ 72                                | 2088 $\pm$ 72                                 | 1960 $\pm$ 68                                              | 98 $\pm$ 2                                                   | 30.6 $\pm$ 1.5                                          |
|      | HL-  | LC            | 350 $\pm$ 18                          | 8.08 $\pm$ 0.01        | 2193 $\pm$ 71                                | 1912 $\pm$ 68                                 | 1701 $\pm$ 63                                              | 200 $\pm$ 5                                                  | 11.3 $\pm$ 0.6                                          |
| LNLP | HC   | 977 $\pm$ 59  | 7.70 $\pm$ 0.01                       | 2192 $\pm$ 78          | 2086 $\pm$ 79                                | 1959 $\pm$ 76                                 | 95 $\pm$ 2                                                 | 31.6 $\pm$ 1.9                                               |                                                         |

1144

1145

1146

1147

1148

1149

1150

1151

1152

1153 **Table 2.** Final nitrate and phosphate concentrations (N : P,  $\mu\text{mol L}^{-1}$ ), growth rate ( $\text{d}^{-1}$ ), POC and PIC quotas ( $\mu\text{g C cell}^{-1}$ ), and PIC / POC value. Values in the brackets  
1154 represent final DIN and DIP concentrations, and standard deviation of 4 replicate  
1155 populations for growth rate, POC and PIC quotas, and PIC / POC value. Detailed  
1156 information was shown in Table 1.  
1157

| $p\text{CO}_2$ | T  | Light | Final N : P       | Growth rate  | POC quota   | PIC quota   | PIC/POC     |
|----------------|----|-------|-------------------|--------------|-------------|-------------|-------------|
| LC             | LT | LL    | HNHP (17.1 : 0.7) | 0.96 (0.012) | 1.80 (0.14) | 0.38 (0.09) | 0.21 (0.07) |
|                |    | HL    | HNHP (17.3 : 0.5) | 1.09 (0.006) | 2.50 (0.28) | 0.62 (0.05) | 0.25 (0.05) |
|                |    | HL    | LNHP (2.5 : 0.6)  | 1.00 (0.013) | 2.07 (0.25) | 0.90 (0.02) | 0.44 (0.05) |
|                |    | HL    | HNLP (15.4 : 0.1) | 1.08 (0.006) | 2.42 (0.08) | 0.83 (0.04) | 0.34 (0.01) |
|                |    | HL    | LNLP (2.4 : 0.1)  | 0.99 (0.003) | 2.62 (0.25) | 1.62 (0.14) | 0.63 (0.11) |
| HC             | LT | LL    | HNHP (18.6 : 0.9) | 0.79 (0.012) | 2.52 (0.33) | 0.26 (0.06) | 0.10 (0.04) |
|                |    | HL    | HNHP (18.2 : 0.5) | 1.04 (0.012) | 2.85 (0.36) | 0.41 (0.06) | 0.15 (0.04) |
|                |    | HL    | LNHP (2.0 : 0.6)  | 0.92 (0.026) | 2.75 (0.23) | 0.68 (0.03) | 0.25 (0.03) |
|                |    | HL    | HNLP (15.5 : 0.1) | 0.85 (0.002) | 5.06 (0.34) | 0.64 (0.05) | 0.13 (0.01) |
|                |    | HL    | LNLP (2.7 : 0.1)  | 0.67 (0.005) | 4.91 (0.28) | 0.90 (0.01) | 0.18 (0.01) |
| LC             | HT | LL    | HNHP (16.6 : 0.3) | 1.03 (0.006) | 1.58 (0.11) | 0.43 (0.02) | 0.27 (0.01) |
|                |    | HL    | HNHP (17.3 : 0.3) | 1.46 (0.004) | 2.15 (0.28) | 0.52 (0.07) | 0.25 (0.06) |
|                |    | HL    | LNHP (2.1 : 0.5)  | 1.42 (0.004) | 1.68 (0.05) | 0.79 (0.04) | 0.47 (0.03) |
|                |    | HL    | HNLP (17.0 : 0.1) | 1.44 (0.004) | 2.09 (0.03) | 1.00 (0.05) | 0.48 (0.03) |
|                |    | HL    | LNLP (2.1 : 0.1)  | 1.39 (0.038) | 2.02 (0.05) | 1.17 (0.13) | 0.58 (0.07) |
| HC             | HT | LL    | HNHP (16.7 : 0.4) | 0.99 (0.008) | 1.54 (0.12) | 0.34 (0.05) | 0.22 (0.04) |
|                |    | HL    | HNHP (17.9 : 0.5) | 1.43 (0.001) | 2.57 (0.06) | 0.42 (0.02) | 0.16 (0.01) |
|                |    | HL    | LNHP (2.4 : 0.6)  | 1.38 (0.009) | 1.97 (0.03) | 0.52 (0.03) | 0.27 (0.01) |
|                |    | HL    | HNLP (17.1 : 0.1) | 1.27 (0.018) | 3.68 (0.50) | 0.74 (0.06) | 0.20 (0.02) |
|                |    | HL    | LNLP (2.2 : 0.1)  | 0.87 (0.022) | 3.81 (0.39) | 0.89 (0.10) | 0.20 (0.04) |

1158

1159

1160

1161

1162

1163

1164

1165



1166 **Table 3.** Results of three-way ANOVAs of the effects of temperature (T),  $p\text{CO}_2$  (C)  
 1167 and light intensity (L) and their interaction on growth rate, POC and PIC quotas, and  
 1168 PIC / POC value. Significant values were marked in bold.

|                 |          | T               | C               | L               | T×C             | T×L             | C×L             | T×C×L           |
|-----------------|----------|-----------------|-----------------|-----------------|-----------------|-----------------|-----------------|-----------------|
| Growth rate     | F        | 20037.5         | 477.4           | 23625.8         | 120.0           | 1550.9          | 34.0            | 86.4            |
|                 | <i>p</i> | <b>&lt;0.01</b> | <b>&lt;0.01</b> | <b>&lt;0.01</b> | <b>&lt;0.01</b> | <b>&lt;0.01</b> | <b>&lt;0.01</b> | <b>&lt;0.01</b> |
| POC quota       | F        | 27.1            | 54.4            | 62.0            | 7.4             | 1.9             | < 0.1           | 6.1             |
|                 | <i>p</i> | <b>&lt;0.01</b> | <b>&lt;0.01</b> | <b>&lt;0.01</b> | <b>0.01</b>     | 0.18            | 0.83            | <b>0.02</b>     |
| PIC quota       | F        | 0.4             | 38.6            | 47.6            | 2.3             | 6.6             | 1.6             | 1.1             |
|                 | <i>p</i> | 0.56            | <b>&lt;0.01</b> | <b>&lt;0.01</b> | 0.14            | <b>0.02</b>     | 0.22            | 0.31            |
| PIC / POC value | F        | 9.9             | 443.6           | 2.0             | 0.8             | 10.0            | 0.6             | 0.3             |
|                 | <i>p</i> | <b>&lt;0.01</b> | <b>&lt;0.01</b> | 0.17            | 0.38            | <b>&lt;0.01</b> | 0.46            | 0.60            |

1169

1170

1171

1172

1173

1174

1175

1176

1177

1178

1179

1180

1181

1182

1183

1184

1185

1186

1187 **Table 4.** Results of four-way ANOVAs of the effects of temperature (T),  $p\text{CO}_2$  (C),  
 1188 dissolved inorganic nitrate (N) and phosphate (P) concentrations and their interaction  
 1189 on growth rate, POC and PIC quotas, and PIC / POC value. Significant values were  
 1190 marked in bold.

|         | Growth rate |               | POC quota |               | PIC quota |               | PIC / POC value |               |
|---------|-------------|---------------|-----------|---------------|-----------|---------------|-----------------|---------------|
|         | F           | <i>p</i>      | F         | <i>p</i>      | F         | <i>p</i>      | F               | <i>p</i>      |
| T       | 500026.0    | < <b>0.01</b> | 297.4     | < <b>0.01</b> | 30.2      | < <b>0.01</b> | 82.8            | < <b>0.01</b> |
| C       | 5798.0      | < <b>0.01</b> | 162.8     | < <b>0.01</b> | 376.2     | < <b>0.01</b> | 787.3           | < <b>0.01</b> |
| N       | 4542.0      | < <b>0.01</b> | 157.0     | < <b>0.01</b> | 84.4      | < <b>0.01</b> | 127.6           | < <b>0.01</b> |
| P       | 5347.0      | < <b>0.01</b> | 206.5     | < <b>0.01</b> | 474.6     | < <b>0.01</b> | 0.1             | 0.74          |
| T×C     | 6899.0      | < <b>0.01</b> | 52.2      | < <b>0.01</b> | 0.2       | 0.68          | 7.2             | < <b>0.01</b> |
| T×N     | 510.0       | < <b>0.01</b> | 5.6       | <b>0.02</b>   | 60.0      | < <b>0.01</b> | 7.9             | < <b>0.01</b> |
| T×P     | 39.0        | < <b>0.01</b> | 5.2       | <b>0.03</b>   | 9.4       | < <b>0.01</b> | 16.2            | < <b>0.01</b> |
| C×N     | 1265.0      | < <b>0.01</b> | 107.2     | < <b>0.01</b> | 9.5       | < <b>0.01</b> | 3.1             | 0.09          |
| C×P     | 1718.0      | < <b>0.01</b> | 174.1     | < <b>0.01</b> | 14.7      | < <b>0.01</b> | 88.0            | < <b>0.01</b> |
| N×P     | 179.0       | < <b>0.01</b> | 19.7      | < <b>0.01</b> | 10.7      | < <b>0.01</b> | 14.3            | < <b>0.01</b> |
| T×C×N   | 35.0        | < <b>0.01</b> | <0.1      | 0.81          | 0.2       | 0.67          | 1.9             | 0.17          |
| T×C×P   | 27.0        | < <b>0.01</b> | 5.5       | <b>0.02</b>   | 0.1       | 0.71          | 1.0             | 0.31          |
| T×N×P   | 96.0        | < <b>0.01</b> | <0.1      | 0.80          | 15.7      | < <b>0.01</b> | 3.3             | 0.08          |
| C×N×P   | 241.0       | < <b>0.01</b> | 0.4       | 0.56          | 8.2       | < <b>0.01</b> | 1.2             | 0.28          |
| T×C×N×P | 105.0       | < <b>0.01</b> | 3.9       | 0.05          | 22.4      | < <b>0.01</b> | 4.5             | <b>0.04</b>   |

1191

1192

1193

1194

1195

1196

1197

1198

1199

1200

1201

1202

1203

1204

1205 **Table 5.** List of the physiological responses of *E. huxleyi* to the concurrent changes in  
1206 multiple drivers investigated by the laboratory incubations in the published studies. ‘↑’  
1207 represents increase, ‘↓’ represents decrease, and ‘n’ represents no significant change  
1208 to simultaneous changes in multiple drivers. C, T, L, N, P and  $\mu$  represent CO<sub>2</sub> ( $\mu$ atm),  
1209 temperature ( $^{\circ}$ C), light intensity ( $\mu$ mol photons m<sup>-2</sup> s<sup>-1</sup>), dissolved inorganic nitrogen  
1210 and phosphate ( $\mu$ mol L<sup>-1</sup>), and growth rate, respectively. Simultaneous changes in  
1211 multiple drivers were marked in bold. [1] represents De Bodt et al., (2010), [2]  
1212 Borchard et al., (2011), [3] Sett et al., (2014), [4] Gafar and Schulz, (2018), [5] Tong  
1213 et al., (2019), [6] Jin et al., (2017), [7] Bretherton et al., (2019), [8] Rost et al., (2002),  
1214 [9] Feng et al., (2008), [10] Müller et al. (2012), [11] Perrin et al., (2016), [12]  
1215 Leonardos and Geider, (2005), [13] Matthiessen et al., (2012), [14] Zhang et al.,  
1216 (2019), [15] this study.

| Strain     | C                  | T               | L                 | N               | P               | $\mu$ | POC | PIC | PIC:<br>POC | Cite |
|------------|--------------------|-----------------|-------------------|-----------------|-----------------|-------|-----|-----|-------------|------|
| AC481      | <b>380 to 750</b>  | <b>13 to 18</b> | 150               | 32              | 1               | n     | ↑   | ↓   | ↓           | [1]  |
| PML B92/11 | <b>300 to 900</b>  | <b>14 to 18</b> | 300               | 29              | 1               | ↑     | n   | ↓   | ↓           | [2]  |
| PML B92/11 | <b>400 to 1000</b> | <b>10 to 20</b> | 150               | 64              | 4               | ↑     | ↑   | ↓   | ↓           | [3]  |
| PML B92/11 | <b>400 to 1000</b> | <b>10 to 20</b> | 150               | 64              | 4               | ↑     | ↓   | ↓   |             | [4]  |
| PML B92/11 | <b>400 to 1000</b> | <b>15 to 24</b> | 190               | 100             | 10              | ↑     | ↑   | ↓   | ↓           | [5]  |
| CCMP2090   | <b>395 to 1000</b> | 20              | <b>57 to 567</b>  | 110             | 10              | ↑     | ↑   |     |             | [6]  |
| NZEH       | <b>390 to 1000</b> | 20              | <b>175 to 300</b> | 100             | 10              | ↓     | ↑   | ↑   | ↑           | [7]  |
| PCC124-3   | <b>390 to 1000</b> | 20              | <b>175 to 300</b> | 100             | 10              | ↑     | n   | ↑   | ↑           | [7]  |
| PCC70-3    | <b>390 to 1000</b> | 20              | <b>175 to 300</b> | 100             | 10              | ↑     | n   | ↑   | ↑           | [7]  |
| PML B92/11 | <b>140 to 880</b>  | 15              | <b>80 to 150</b>  | 100             | 6               | ↑     | ↑   | ↓   | ↓           | [8]  |
| PML B92/11 | <b>395 to 1000</b> | 20              | <b>54 to 457</b>  | 110             | 10              | ↑     | ↑   | ↓   | ↓           | [6]  |
| PML B92/11 | <b>400 to 1000</b> | 20              | <b>50 to 1200</b> | 64              | 4               | ↑     | ↑   | ↑   |             | [4]  |
| RCC962     | <b>390 to 1000</b> | 20              | <b>175 to 300</b> | 100             | 10              | ↓     | ↑   | n   | ↓           | [7]  |
| CCMP371    | <b>375 to 750</b>  | <b>20 to 24</b> | <b>50 to 400</b>  | 100             | 10              | ↑     | n   | ↓   | ↓           | [9]  |
| B62        | <b>280 to 1000</b> | 20              | 300               | <b>88 to 9</b>  | 4               |       | ↑   | ↓   | ↓           | [10] |
| RCC911     | 400                | 20              | <b>30 to 140</b>  | <b>100 to 5</b> | 6               | ↑     | ↑   | ↑   | ↑           | [11] |
| RCC911     | 400                | 20              | <b>30 to 140</b>  | 100             | <b>6 to 0.6</b> | ↑     | ↑   | ↑   | ↑           | [11] |

|            |                    |                 |                  |                 |                   |   |   |   |   |      |      |
|------------|--------------------|-----------------|------------------|-----------------|-------------------|---|---|---|---|------|------|
| PML92A     | <b>360 to 2000</b> | 18              | <b>80 to 500</b> | 200             | <b>6.7 to 40</b>  | n | ↑ |   |   | [12] |      |
| A          | <b>460 to 1280</b> | 16              | 130              | <b>17 to 9</b>  | <b>0.2 to 0.5</b> |   | ↓ | ↓ |   | [13] |      |
| PML B92/11 | <b>410 to 920</b>  | 20              | <b>80 to 480</b> | <b>100 to 8</b> | 10                |   | ↓ | ↓ | ↑ | ↑    | [14] |
| PML B92/11 | <b>410 to 920</b>  | 20              | <b>80 to 480</b> | 100             | <b>10 to 0.4</b>  |   | ↓ | ↑ | n | ↓    | [14] |
| PML B92/11 | <b>370 to 960</b>  | <b>16 to 20</b> | <b>60 to 240</b> | <b>24 to 8</b>  | <b>1.5 to 0.5</b> |   | ↓ | ↑ | ↑ | n    | [15] |

1217

1218

1219

1220

1221

1222

1223

1224

1225

1226

1227

1228

1229

1230

1231

1232

1233

1234

1235

1236

1237

1238

1239

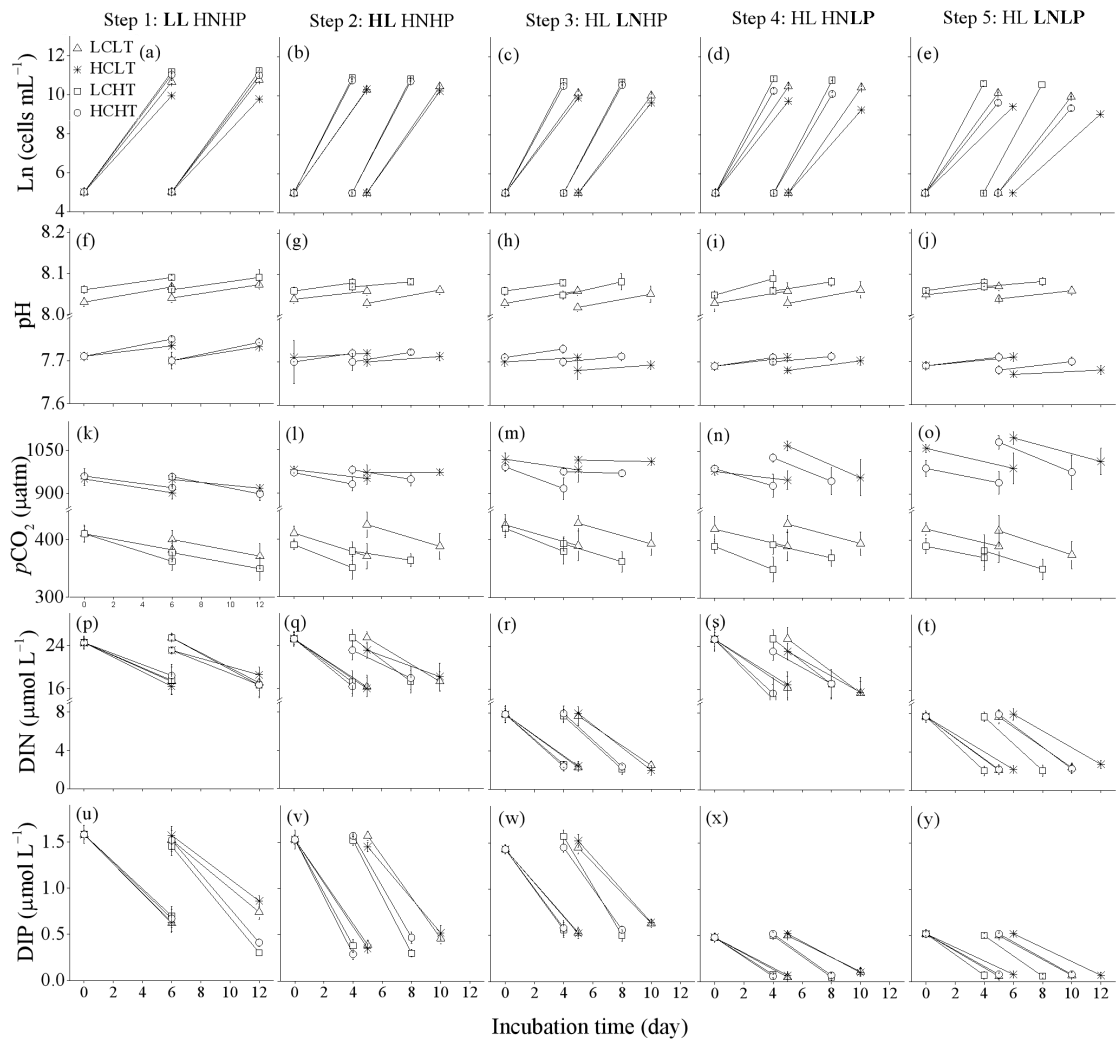

1240

1241

1242

1243 Figure 1

1244

1245

1246

1247

1248

1249

1250

1251

1252

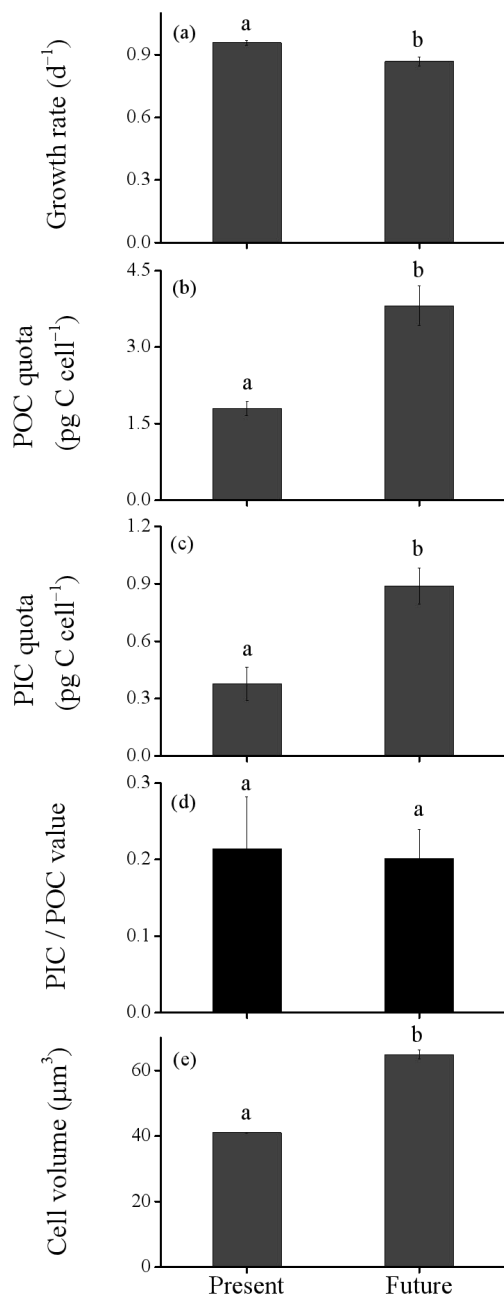

1253

1254

1255 Figure 2

1256

1257

1258

1259

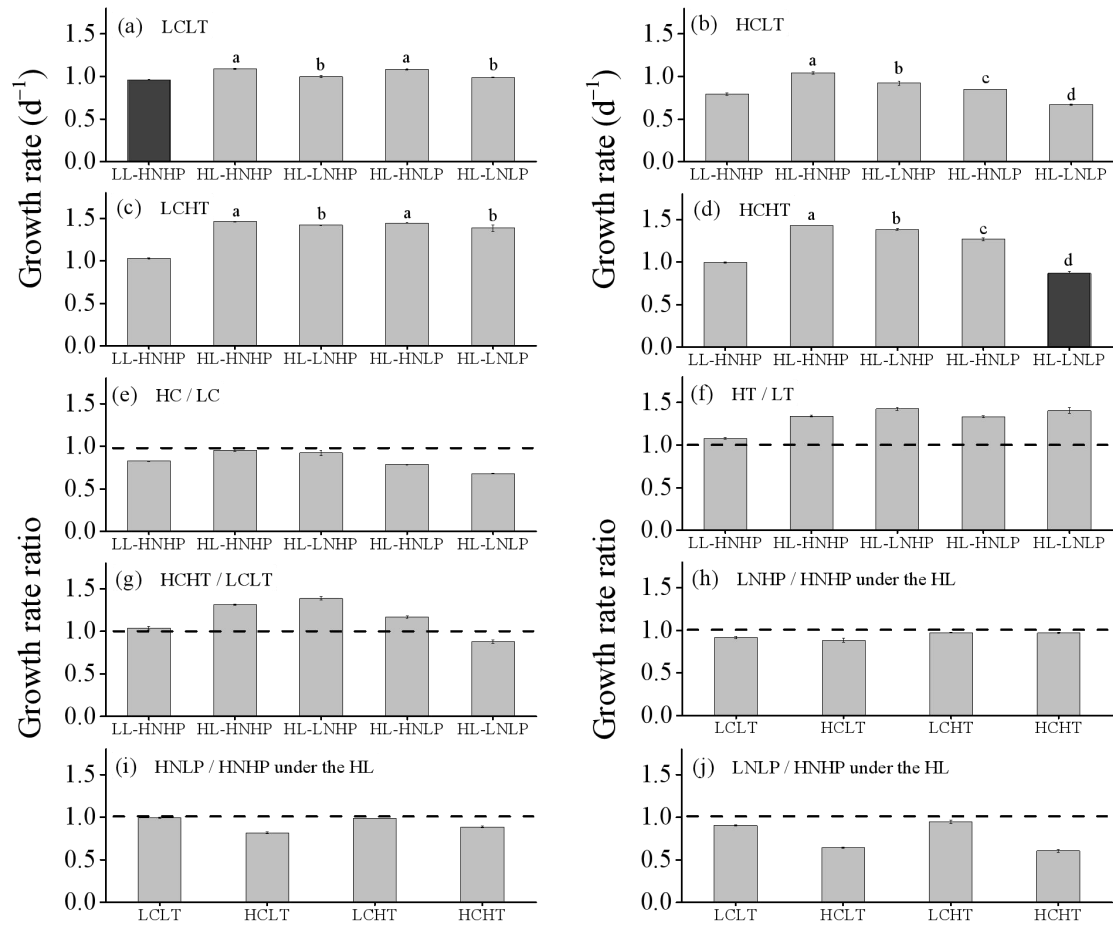

1260

1261

1262

1263 Figure 3

1264

1265

1266

1267

1268

1269

1270

1271

1272

1273

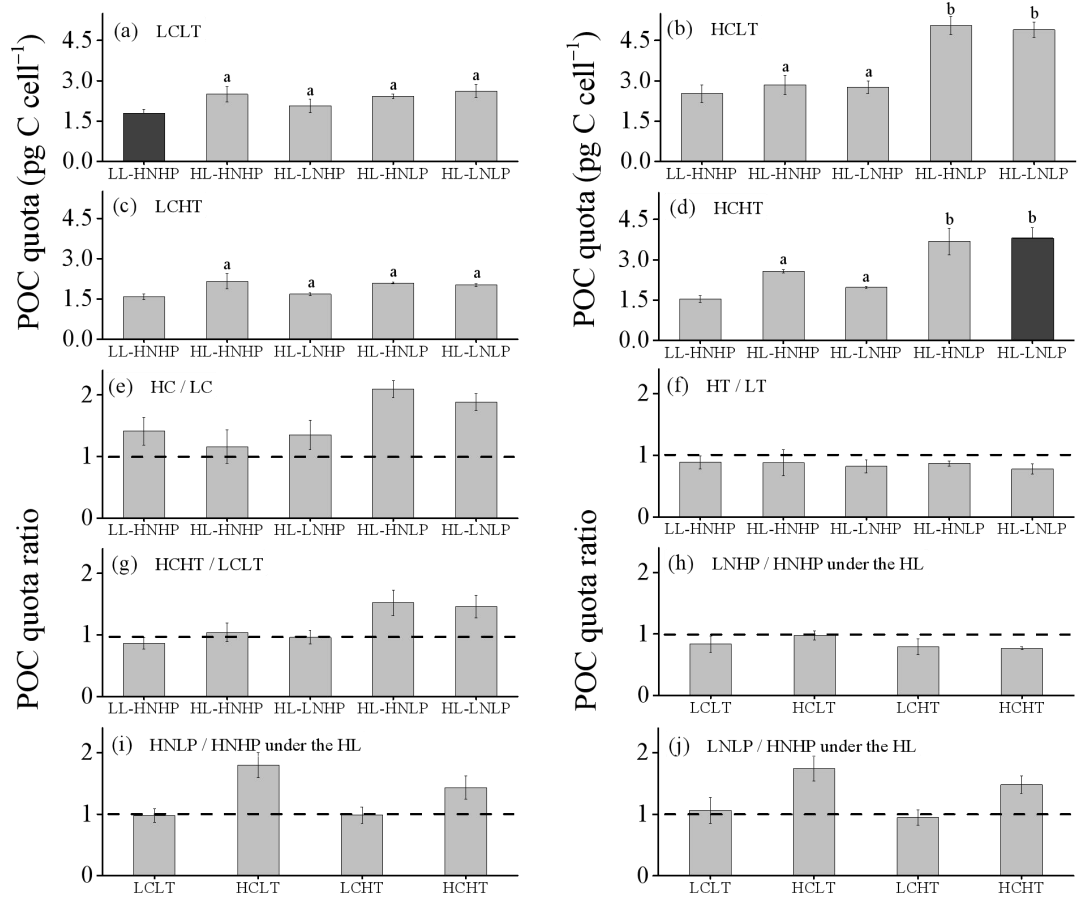

1274

1275

1276

1277

1278 Figure 4

1279

1280

1281

1282

1283

1284

1285



1286

1287

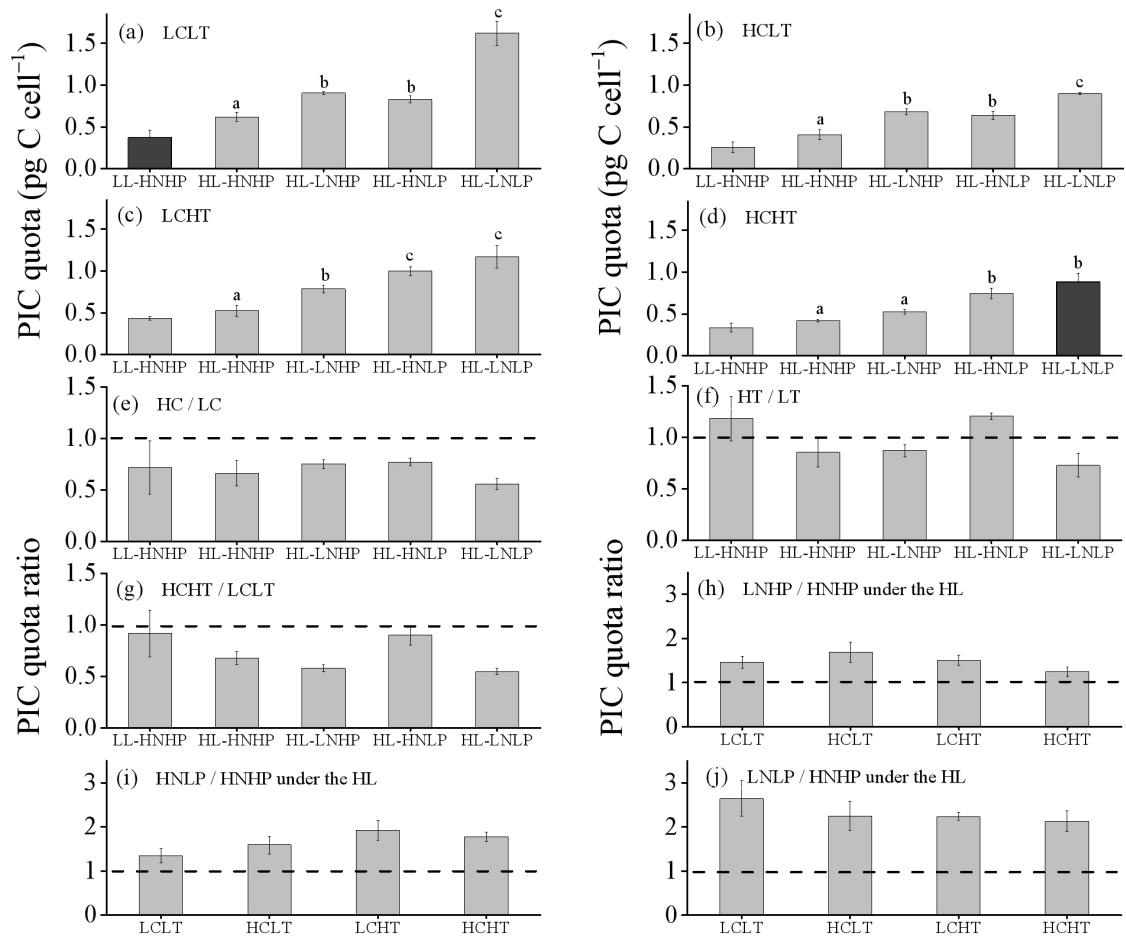

1288

1289

1290

1291

1292 Figure 5

1293

1294

1295

1296

1297

1298

1299

1300

1301

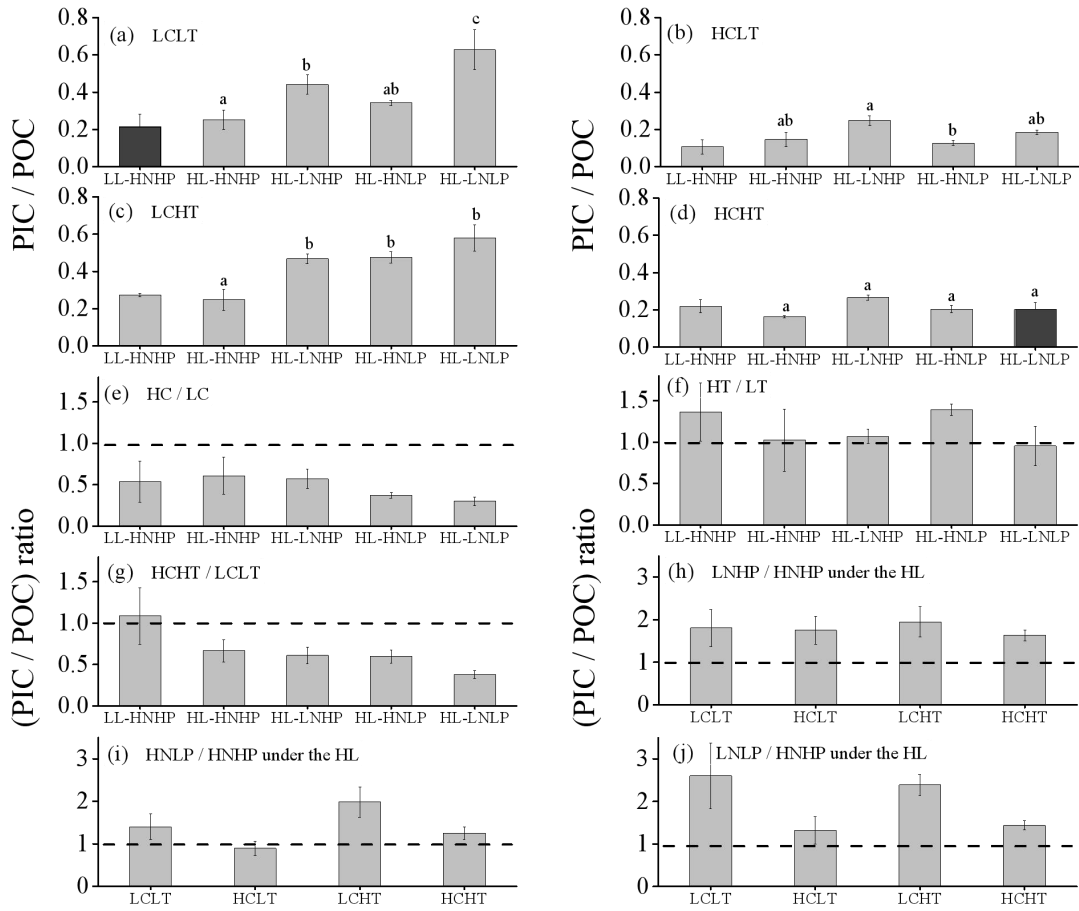

1302

1303

1304

1305

1306

1307 Figure 6

1308

1309
